# Supplementary material for: Establishment of a large-scale patient-derived high-risk colorectal adenoma organoid biobank for high-throughput and high-content drug screening
Source: PubMed Central journal article supplement (PMC10478412; doi:10.1186/s12916-023-03034-y), 2023-09-04
Supplement: 12916_2023_3034_MOESM2_ESM.pdf [file 12916_2023_3034_MOESM2_ESM.pdf]

| Hugo_Symbol | Tumor_Sample_Barcode | Chromosome | Start_Position | End_Position | Variant_Classification | Variant_Type | Reference_Allele | Tumor_Seq_Allele1 | Tumor_Seq_Allele2 | Protein_Change                                        | i_Tumor/AF_WU | i_transcript_name |
|-------------|----------------------|------------|----------------|--------------|------------------------|--------------|------------------|-------------------|-------------------|-------------------------------------------------------|---------------|-------------------|
| KRAS        | O1                   | 12         | 25380276       | 25380276     | Missense_Mutation      | SNP          | T                | C                 | C                 | KRAS-NM_033360:exon3:c.162A>G:p.G61R                  | 21.82         | NM_033360         |
| C14orf37    | O1                   | 14         | 58471800       | 58471800     | Missense_Mutation      | SNP          | C                | T                 | T                 | C14orf37-NM_001081872:exon7:c.222G>A:p.R74I0          | 19.05         | NM_001081872      |
| DNAH3       | O1                   | 16         | 20996749       | 20996749     | Missense_Mutation      | SNP          | C                | T                 | T                 | DNAH3-NM_017533:exon4:c.7315G>A:p.G2438R              | 24.73         | NM_017533         |
| ABCC12      | O1                   | 16         | 48148472       | 48148472     | Missense_Mutation      | SNP          | G                | G                 | A                 | ABCC12-NM_033226:exon13:c.1843C>T:p.R615C             | 10.27         | NM_033226         |
| GJC1        | O1                   | 17         | 42882687       | 42882687     | Missense_Mutation      | SNP          | G                | G                 | A                 | GJC1-NM_005497:exon3:c.499C>T:p.R167W                 | 13.78         | NM_005497         |
| TP53        | O1                   | 17         | 7578203        | 7578203      | Missense_Mutation      | SNP          | C                | C                 | T                 | TP53-NM_000546:exon8:c.646G>A:p.V219M                 | 10.75         | NM_000546         |
| SMAD4       | O1                   | 18         | 48593466       | 48593466     | Missense_Mutation      | SNP          | C                | C                 | T                 | SMAD4-NM_000568:exon10:c.1217C>T:p.A406V              | 12.31         | NM_000568         |
| HAUS5       | O1                   | 19         | 36109580       | 36109580     | Missense_Mutation      | SNP          | G                | G                 | A                 | HAUS5-NM_015302:exon12:c.995C>A:p.R329I               | 18.03         | NM_015302         |
| NLRP5       | O1                   | 19         | 56565093       | 56565093     | Missense_Mutation      | SNP          | C                | C                 | T                 | NLRP5-NM_153447:exon13:c.3218C>T:p.T1073M             | 9.85          | NM_153447         |
| PCBP1       | O1                   | 2          | 70315174       | 70315174     | Missense_Mutation      | SNP          | T                | T                 | A                 | PCBP1-NM_008196:exon1:c.299T>A:p.L100Q                | 25            | NM_008196         |
| PRR23C      | O1                   | 3          | 138762733      | 138762733    | Missense_Mutation      | SNP          | G                | G                 | A                 | PRR23C-NM_001134657:exon1:c.730C>T:p.R244C            | 12.16         | NM_001134657      |
| APC         | O1                   | 5          | 112175273      | 112175273    | Nonsense_Mutation      | SNP          | C                | C                 | T                 | APC-NM_000038:exon16:c.3988C>T:p.Q128I                | 43.3          | NM_000038         |
| CFB         | O1                   | 6          | 31915244       | 31915244     | Missense_Mutation      | SNP          | C                | C                 | T                 | CFB-NM_001710:exon4:c.604C>T:p.R202W                  | 47.42         | NM_001710         |
| CLASRP      | O1                   | 19         | 45567607       | 45567609     | In_Frame_Del           | DEL          | CTC              | CTC               | -                 | CLASRP-NM_007056:exon13:c.1148_1151delCTC:p.S384del   | 12.5          | NM_007056         |
| ITIH2       | O1                   | 10         | 7773844        | 7773844      | Missense_Mutation      | SNP          | C                | C                 | T                 | ITIH2-NM_002216:exon13:c.1532C>T:p.T511M              | 12.68         | NM_002216         |
| MCAL2       | O1                   | 11         | 12281344       | 12281344     | Missense_Mutation      | SNP          | G                | G                 | T                 | MCAL2-NM_014623:exon26:c.3234G>T:p.E1070D             | 38.71         | NM_014623         |
| FAM118B     | O1                   | 11         | 126110795      | 126110795    | Nonsense_Mutation      | SNP          | G                | G                 | T                 | FAM118B-NM_024556:exon4:c.195G>A:p.W65*               | 22.47         | NM_024556         |
| PLEKHA7     | O1                   | 11         | 16848121       | 16848121     | Nonsense_Mutation      | SNP          | C                | C                 | A                 | PLEKHA7-NM_001526:exon10:c.888G>T:p.E297*             | 24.72         | NM_001526         |
| IGSF22      | O1                   | 11         | 16730652       | 16730652     | Missense_Mutation      | SNP          | G                | G                 | A                 | IGSF22-NM_173588:exon18:c.2980C>T:p.R994C             | 27.78         | NM_173588         |
| CCDC179     | O1                   | 11         | 22881002       | 22881002     | Nonsense_Mutation      | SNP          | C                | C                 | T                 | CCDC179-NM_001956:exon2:c.86G>A:p.R29Q                | 35            | NM_001956         |
| ANO3        | O1                   | 11         | 26547183       | 26547183     | Frame_Shift_Ins        | DEL          | A                | A                 | -                 | ANO3-NM_001313728:exon8:c.882delA:p.K294fs            | 36.96         | NM_001313728      |
| LRRCC4      | O1                   | 11         | 40137645       | 40137646     | Frame_Shift_Ins        | INS          | -                | -                 | T                 | LRRCC4-NM_020929:exon5:c.197dupA:p.N66fs              | 32.95         | NM_020929         |
| ANP32E      | O1                   | 1          | 150199042      | 150199042    | Missense_Mutation      | SNP          | C                | C                 | A                 | ANP32E-NM_030920:exon5:c.579G>T:p.E193D               | 17.78         | NM_030920         |
| MSA4B       | O1                   | 11         | 60482518       | 60482518     | Missense_Mutation      | SNP          | G                | G                 | A                 | MSA4B-NM_011457:exon6:c.559G>A:p.V187M                | 14.81         | NM_011457         |
| PACS1       | O1                   | 11         | 69001356       | 69001356     | Missense_Mutation      | SNP          | G                | G                 | T                 | PACS1-NM_018026:exon16:c.1939G>T:p.A647S              | 34.15         | NM_018026         |
| INPPL1      | O1                   | 11         | 71944155       | 71944155     | Missense_Mutation      | SNP          | A                | A                 | G                 | INPPL1-NM_001567:exon17:c.1988A>G:p.Y663C             | 24.05         | NM_001567         |
| KLRC4       | O1                   | 12         | 10560957       | 10560957     | Missense_Mutation      | SNP          | T                | T                 | C                 | KLRC4-NM_013431:exon3:c.311A>G:p.N104S                | 44            | NM_013431         |
| CCDC91      | O1                   | 12         | 28605426       | 28605426     | Missense_Mutation      | SNP          | G                | G                 | A                 | CCDC91-NM_016118:exon10:c.940G>A:p.V314M              | 53.13         | NM_016118         |
| RYR2        | O1                   | 1          | 237774113      | 237774113    | Missense_Mutation      | SNP          | G                | G                 | A                 | RYR2-NM_001035:exon36:c.4735G>A:p.V1579M              | 29.29         | NM_001035         |
| KRT1        | O1                   | 12         | 53069243       | 53069243     | Missense_Mutation      | SNP          | T                | T                 | C                 | KRT1-NM_006121:exon6:c.1668A>G:p.S557G                | 20.18         | NM_006121         |
| PTPRQ       | O1                   | 12         | 80838175       | 80838175     | Missense_Mutation      | SNP          | C                | C                 | T                 | PTPRQ-NM_014502:exon1:c.50C>T:p.T17I                  | 28.81         | NM_014502         |
| ZMYM6       | O1                   | 1          | 35453270       | 35453273     | Frame_Shift_Ins        | DEL          | AAGA             | AAGA              | -                 | ZMYM6-NM_007167:exon16:c.3410_3413delTTT:p.F1137fs    | 12.63         | NM_007167         |
| PCDH17      | O1                   | 13         | 58208888       | 58208888     | Missense_Mutation      | SNP          | G                | G                 | T                 | PCDH17-NM_001404:exon1:c.2286G>T:p.E740D              | 17.82         | NM_001404         |
| TMCO2       | O1                   | 1          | 40713748       | 40713749     | Frame_Shift_Ins        | INS          | -                | -                 | T                 | TMCO2-NM_001067:exon1:c.89dupT:p.L30fs                | 23.81         | NM_001067         |
| OR4N2       | O1                   | 14         | 20296298       | 20296298     | Missense_Mutation      | SNP          | G                | G                 | A                 | OR4N2-NM_001004:exon2:c.691G>A:p.E231K                | 41.18         | NM_001004         |
| C14orf39    | O1                   | 14         | 60933757       | 60933757     | Missense_Mutation      | SNP          | G                | G                 | A                 | C14orf39-NM_174978:exon18:c.1570C>T:p.L524F           | 45.28         | NM_174978         |
| C14orf39    | O1                   | 14         | 60932752       | 60932752     | Missense_Mutation      | SNP          | G                | G                 | A                 | C14orf39-NM_174978:exon11:c.917C>T:p.A306V            | 51.61         | NM_174978         |
| NEK9        | O1                   | 14         | 75563914       | 75563914     | Missense_Mutation      | SNP          | C                | C                 | T                 | NEK9-NM_00132923:exon17:c.2098G>A:p.E700K             | 38.21         | NM_00132923       |
| SNW1        | O1                   | 14         | 78189588       | 78189588     | Missense_Mutation      | SNP          | G                | G                 | T                 | SNW1-NM_001318:exon11:c.1086C>T:p.R360W               | 11.11         | NM_001318         |
| BEND5       | O1                   | 1          | 49224895       | 49224895     | Missense_Mutation      | SNP          | C                | C                 | T                 | BEND5-NM_024603:exon3:c.422G>A:p.R141D                | 10.68         | NM_024603         |
| ADAMTS1     | O1                   | 15         | 79058622       | 79058622     | Missense_Mutation      | SNP          | G                | G                 | A                 | ADAMTS1-NM_014272:exon19:c.631C>T:p.R211W             | 10.04         | NM_014272         |
| KIF7        | O1                   | 15         | 90173714       | 90173714     | Missense_Mutation      | SNP          | G                | G                 | A                 | KIF7-NM_198525:exon16:c.3122C>T:p.T1041M              | 41.27         | NM_198525         |
| CACNA1H     | O1                   | 16         | 1259312        | 1259312      | Missense_Mutation      | SNP          | G                | G                 | A                 | CACNA1H-NM_021098:exon17:c.644C>A:p.R1215H            | 45.87         | NM_021098         |
| PDLT        | O1                   | 16         | 20410333       | 20410333     | Missense_Mutation      | SNP          | G                | G                 | T                 | PDLT-NM_174924:exon2:c.90C>A:p.S30R                   | 10.48         | NM_174924         |
| ARHGAP17    | O1                   | 16         | 24942383       | 24942383     | Missense_Mutation      | SNP          | C                | C                 | A                 | ARHGAP17-NM_001068:exon19:c.2237G>T:p.G746V           | 11.02         | NM_001068         |
| SRRM2       | O1                   | 16         | 2812492        | 2812492      | Missense_Mutation      | SNP          | C                | C                 | T                 | SRRM2-NM_016333:exon11:c.1963C>T:p.R655C              | 24.46         | NM_016333         |
| COG8        | O1                   | 16         | 69370591       | 69370591     | Missense_Mutation      | SNP          | C                | C                 | A                 | COG8-NM_032385:exon2:c.402G>T:p.E134D                 | 40.85         | NM_032385         |
| KRTAP4-5    | O1                   | 17         | 39305769       | 39305769     | Missense_Mutation      | SNP          | G                | G                 | C                 | 5.NM_033188:exon1:c.251C>G:p.T84S                     | 31.58         | NM_033188         |
| PIEZO2      | O1                   | 18         | 10704526       | 10704526     | Missense_Mutation      | SNP          | C                | C                 | T                 | PIEZO2-NM_020668:exon38:c.5785G>A:p.V1929M            | 20.43         | NM_020668         |
| ZNF440      | O1                   | 19         | 11943022       | 11943022     | Missense_Mutation      | SNP          | T                | T                 | C                 | ZNF440-NM_152577:exon4:c.1031T>C:p.S347T              | 60            | NM_152577         |
| L12RB1      | O1                   | 19         | 18188352       | 18188352     | Missense_Mutation      | SNP          | G                | G                 | A                 | L12RB1-NM_005535:exon5:c.523C>T:p.R175W               | 52.73         | NM_005535         |
| ZNF682      | O1                   | 19         | 20116980       | 20116980     | Missense_Mutation      | SNP          | T                | T                 | C                 | ZNF682-NM_083190:exon1:c.1331A>G:p.K444R              | 40.82         | NM_033190         |
| ZNF235      | O1                   | 19         | 44792897       | 44792897     | Missense_Mutation      | SNP          | T                | T                 | C                 | ZNF235-NM_004234:exon5:c.691A>G:p.K231E               | 11.81         | NM_004234         |
| APOC2       | O1                   | 19         | 45452483       | 45452470     | Frame_Shift_Ins        | DEL          | TTTTACT          | TTTTACT           | -                 | APOC2-NM_000483:exon4:c.263_270delTTTTACT:p.I88fs     | 15.65         | NM_000483         |
| SHANK1      | O1                   | 19         | 51219930       | 51219930     | Missense_Mutation      | SNP          | G                | G                 | A                 | SHANK1-NM_016148:exon1:c.247C>T:p.H83Y                | 18.74         | NM_016148         |
| RALGAP2     | O1                   | 20         | 20571844       | 20571844     | Missense_Mutation      | SNP          | G                | G                 | A                 | RALGAP2-NM_003043:exon17:c.2318C>T:p.P773L            | 16.98         | NM_003043         |
| ILIR2       | O1                   | 2          | 102842898      | 102842898    | Missense_Mutation      | SNP          | G                | G                 | A                 | ILIR2-NM_004633:exon8:c.1013G>A:p.R138H               | 28.65         | NM_004633         |
| PCNT        | O1                   | 21         | 47831841       | 47831841     | Missense_Mutation      | SNP          | G                | G                 | A                 | PCNT-NM_006031:exon28:c.5854G>A:p.A1952T              | 37.5          | NM_006031         |
| DNAH7       | O1                   | 2          | 196851900      | 196851900    | Missense_Mutation      | SNP          | C                | C                 | T                 | DNAH7-NM_018887:exon14:c.1644G>A:p.H548I              | 56            | NM_018887         |
| DNAH7       | O1                   | 2          | 196851911      | 196851911    | Missense_Mutation      | SNP          | C                | C                 | T                 | DNAH7-NM_018887:exon14:c.1633C>T:p.R545C              | 53.19         | NM_018887         |
| FAM117B     | O1                   | 2          | 203589694      | 203589694    | Missense_Mutation      | SNP          | G                | G                 | A                 | FAM117B-NM_173511:exon3:c.808C>T:p.R270C              | 28.13         | NM_173511         |
| ICA1L       | O1                   | 2          | 203684596      | 203684596    | Missense_Mutation      | SNP          | C                | C                 | T                 | ICA1L-NM_138468:exon6:c.386G>A:p.R129H                | 22.73         | NM_138468         |
| SPAG16      | O1                   | 2          | 214149289      | 214149289    | Missense_Mutation      | SNP          | G                | G                 | T                 | SPAG16-NM_024532:exon1:c.82G>T:p.G29I                 | 41.18         | NM_024532         |
| DMC1        | O1                   | 22         | 38934351       | 38934351     | Missense_Mutation      | SNP          | G                | G                 | A                 | DMC1-NM_007068:exon11:c.724C>T:p.R242W                | 31.53         | NM_007068         |
| VPS54       | O1                   | 2          | 64199317       | 64199317     | Missense_Mutation      | SNP          | G                | G                 | A                 | VPS54-NM_016516:exon4:c.440C>T:p.L147I                | 53.85         | NM_016516         |
| GCFC2       | O1                   | 2          | 75923413       | 75923413     | Missense_Mutation      | SNP          | T                | T                 | C                 | GCFC2-NM_003023:exon5:c.748A>G:p.N249S                | 49.02         | NM_003023         |
| DPFA2       | O1                   | 3          | 109031443      | 109031443    | Missense_Mutation      | SNP          | C                | C                 | T                 | DPFA2-NM_138816:exon3:c.130G>A:p.L44I                 | 20            | NM_138816         |
| PLA1A       | O1                   | 3          | 119338415      | 119338415    | Missense_Mutation      | SNP          | G                | G                 | T                 | PLA1A-NM_015900:exon8:c.928G>T:p.V310L                | 11.69         | NM_015900         |
| NPHP3       | O1                   | 3          | 132402305      | 132402305    | Missense_Mutation      | SNP          | C                | C                 | T                 | NPHP3-NM_015324:exon25:c.3634C>G:p.D1219R             | 36.9          | NM_015324         |
| C3orf33     | O1                   | 3          | 155520356      | 155520356    | Missense_Mutation      | SNP          | C                | C                 | T                 | C3orf33-NM_001388229:exon2:c.139G>A:p.A47T            | 48.65         | NM_001388229      |
| ZNF385D     | O1                   | 3          | 21465505       | 21465505     | Missense_Mutation      | SNP          | G                | G                 | T                 | ZNF385D-NM_024697:exon7:c.904C>A:p.P302T              | 18.37         | NM_024697         |
| ROBO1       | O1                   | 3          | 78710404       | 78710404     | Missense_Mutation      | SNP          | T                | T                 | A                 | ROBO1-NM_002941:exon16:c.2096A>T:p.Q699L              | 28.57         | NM_002941         |
| ANK2        | O1                   | 4          | 114276243      | 114276243    | Missense_Mutation      | SNP          | G                | G                 | A                 | ANK2-NM_001148:exon38:c.6469G>A:p.E157K               | 27.46         | NM_001148         |
| ADAM29      | O1                   | 4          | 175899075      | 175899075    | Missense_Mutation      | COMPLEX      | CA               | CA                | TG                | ADAM29-NM_014269:exon5:c.239_9_2400delCAinsTG:p.T800M | 24.21         | NM_014269         |
| ADAM29      | O1                   | 4          | 175899088      | 175899088    | Missense_Mutation      | SNP          | G                | G                 | T                 | ADAM29-NM_014269:exon5:c.2412G>T:p.R804S              | 28.42         | NM_014269         |
| ADAM29      | O1                   | 4          | 175899091      | 175899091    | Missense_Mutation      | SNP          | A                | A                 | T                 | ADAM29-NM_014269:exon5:c.2416A>T:p.Q805H              | 24.47         | NM_014269         |
| ADAM29      | O1                   | 4          | 175899102      | 175899102    | Missense_Mutation      | SNP          | T                | T                 | C                 | ADAM29-NM_014269:exon5:c.2426T>C:p.E1219R             |               |                   |

|          |    |    |           |           |                   |         |          |          |     |                                                           |       |              |
|----------|----|----|-----------|-----------|-------------------|---------|----------|----------|-----|-----------------------------------------------------------|-------|--------------|
| HNRNP40  | O1 | 5  | 137089172 | 137089180 | In_Frame_Del      | DEL     | CGGCCGCC | CGGCCGCC | -   | HNRNP40.NM_006805.exon1:c.57<br>6_584delGGGCCGCC.p.G193.R | 24.24 | NM_006805    |
| SYNE1    | O1 | 6  | 152644715 | 152644715 | Misense_Mutation  | SNP     | C        | C        | T   | SYNE1.NM_182961.exon5:c.188<br>15G>A.p.R527Q              | 12.82 | NM_182961    |
| KLF14    | O1 | 7  | 130418281 | 130418281 | Misense_Mutation  | SNP     | G        | G        | A   | KLF14.NM_138693.exon1:c.580C><br>T.p.R194C                | 10.99 | NM_138693    |
| EPHB4    | O1 | 7  | 142562154 | 142562154 | Misense_Mutation  | SNP     | G        | G        | A   | EPHB4.NM_004445.exon4:c.596G><br>>A.p.R190Q               | 15.15 | NM_004445    |
| ELFN1    | O1 | 7  | 1784840   | 1784840   | Misense_Mutation  | SNP     | G        | G        | A   | ELFN1.NM_001128637.exon2:c.60<br>65G>A.p.R203H            | 31.47 | NM_001128636 |
| BAG4     | O1 | 8  | 38066607  | 38066607  | Misense_Mutation  | SNP     | G        | G        | A   | BAG4.NM_004874.exon4:c.710G><br>A.p.R237Q                 | 10.58 | NM_004874    |
| VCPIP1   | O1 | 8  | 67547410  | 67547410  | Misense_Mutation  | SNP     | G        | G        | C   | VCPIP1.NM_020595.exon3:c.299S><br>C>G.p.P993A             | 10.67 | NM_020594    |
| OTUD6B   | O1 | 8  | 92097062  | 92097062  | Misense_Mutation  | SNP     | G        | G        | A   | OTUD6B.NM_016023.exon7:c.938<br>G>A.p.R313Q               | 44.59 | NM_016023    |
| FAM78A   | O1 | 9  | 134136367 | 134136367 | Misense_Mutation  | SNP     | G        | G        | A   | FAM78A.NM_033387.exon2:c.694<br>C>T.p.R220V               | 29.63 | NM_033387    |
| IFNA6    | O1 | 9  | 21350544  | 21350544  | Misense_Mutation  | SNP     | G        | G        | T   | IFNA6.NM_021002.exon1:c.343C><br>A.p.G115K                | 11.61 | NM_021002    |
| C9orf64  | O1 | 9  | 86559744  | 86559744  | Misense_Mutation  | SNP     | T        | T        | C   | C9orf64.NM_020307.exon3:c.758A><br>G>A.p.R239H            | 45.61 | NM_023207    |
| KRAS     | O1 | 12 | 25398284  | 25398284  | Misense_Mutation  | SNP     | C        | C        | G   | KRAS.NM_033380.exon2:c.35G>C<br>p.G12A                    | 33.8  | NM_033380    |
| SLC2A14  | O2 | 12 | 7982501   | 7982501   | Misense_Mutation  | SNP     | C        | C        | T   | SLC2A14.NM_001286237.exon4:c.<br>489G>A.p.R163H           | 26.19 | NM_001286237 |
| CLSPN    | O2 | 1  | 36217056  | 36217056  | Misense_Mutation  | SNP     | C        | C        | T   | CLSPN.NM_022111.exon10:c.182<br>3G>A.p.R68Q               | 28.92 | NM_022111    |
| SCEL     | O2 | 13 | 7813971   | 7813971   | Misense_Mutation  | SNP     | G        | G        | A   | SCEL.NM_144777.exon4:c.194G><br>A.p.R95Q                  | 50.94 | NM_144777    |
| MYH8     | O2 | 14 | 2387001   | 2387001   | Misense_Mutation  | SNP     | G        | G        | A   | MYH8.NM_002471.exon13:c.1327<br>C>T.p.R443C               | 5.65  | NM_002471    |
| KCNB1    | O2 | 20 | 47991025  | 47991025  | Misense_Mutation  | SNP     | C        | C        | T   | KCNB1.NM_004975.exon2:c.1072<br>G>A.p.D358N               | 7.45  | NM_004975    |
| CHGB     | O2 | 20 | 5903841   | 5903841   | Misense_Mutation  | SNP     | G        | G        | A   | CHGB.NM_001819.exon4:c.1051G><br>>A.p.V351I               | 25    | NM_001819    |
| CAVIN2   | O2 | 2  | 192711323 | 192711323 | Misense_Mutation  | SNP     | G        | G        | A   | CAVIN2.NM_004667.exon1:c.329C><br>>T.p.T110M              | 12.12 | NM_004667    |
| PCBP1    | O2 | 2  | 70315174  | 70315174  | Misense_Mutation  | SNP     | T        | T        | A   | PCBP1.NM_006196.exon1:c.299T><br>>A.p.L100Q               | 9.71  | NM_006196    |
| KLHL6    | O2 | 3  | 183226065 | 183226065 | Misense_Mutation  | SNP     | C        | C        | T   | KLHL6.NM_130446.exon3:c.691G><br>>A.p.E231K               | 30.69 | NM_130446    |
| PPPSK2   | O2 | 5  | 102494919 | 102494919 | Misense_Mutation  | SNP     | G        | G        | A   | PPPSK2.NM_001281471.exon17:c.<br>1807G>A.p.G603S          | 25.49 | NM_001281471 |
| APC      | O2 | 5  | 112175216 | 112175216 | Nonsense_Mutation | SNP     | G        | C        | T   | APC.NM_000028.exon16:c.3925G><br>>T.E1309*                | 90.59 | NM_000028    |
| ADAMTS16 | O2 | 5  | 5262847   | 5262847   | Nonsense_Mutation | SNP     | C        | C        | T   | ADAMTS16.NM_139056.exon18:c.<br>2740C>T.p.R914*           | 35.59 | NM_139056    |
| ABCA13   | O2 | 7  | 48314760  | 48314760  | Misense_Mutation  | SNP     | C        | C        | T   | ABCA13.NM_152701.exon17:c.54<br>97C>T.p.R183W             | 36.36 | NM_152701    |
| PAPPA    | O2 | 9  | 118950362 | 118950362 | Misense_Mutation  | SNP     | G        | G        | A   | PAPPA.NM_002581.exon2:c.1345<br>G>A.p.V449H               | 33.53 | NM_002581    |
| C9A      | O2 | 9  | 35674204  | 35674204  | Misense_Mutation  | DEL     | T        | T        | C   | C9A.NM_001816.exon1:c.248T>C.<br>p.L83P                   | 12.68 | NM_001816    |
| GNR37L1  | O2 | 1  | 200297525 | 200297525 | In_Frame_Del      | DEL     | CTG      | CTG      | -   | GNR37L1.NM_004767.exon2:c.13<br>85_1307delCTC.p.C436del   | 10    | NM_004767    |
| ORSK4    | O2 | 3  | 98073592  | 98073592  | Frame_Shift_Ins   | DEL     | A        | A        | -   | ORSK4.NM_001005517.exon1:c.9<br>01delA.p.D01fs            | 49.28 | NM_001005517 |
| ANKRD30A | O2 | 10 | 37488689  | 37488689  | Misense_Mutation  | SNP     | G        | G        | C   | ANKRD30A.NM_005297.exon30:c.<br>2585G>C.p.R617H           | 54.55 | NM_005297    |
| KF20B    | O2 | 10 | 91487649  | 91487649  | Misense_Mutation  | SNP     | A        | A        | T   | KF20B.NM_001284259.exon17:c.<br>2267A>T.p.N756I           | 41.67 | NM_001284259 |
| KF20B    | O2 | 10 | 91488979  | 91488979  | Misense_Mutation  | SNP     | A        | A        | T   | KF20B.NM_001284259.exon18:c.<br>2268A>T.p.H756L           | 47.62 | NM_001284259 |
| PLCE1    | O2 | 10 | 95995696  | 95995696  | Misense_Mutation  | SNP     | G        | G        | T   | PLCE1.NM_016341.exon7:c.2239<br>G>T.p.D747Y               | 33.33 | NM_016341    |
| CWF19L2  | O2 | 11 | 10728943  | 10728943  | Misense_Mutation  | SNP     | C        | C        | T   | CWF19L2.NM_152434.exon10:c.1<br>695G>A.p.G517R            | 35.48 | NM_152434    |
| ANOS     | O2 | 11 | 22239626  | 22239626  | Misense_Mutation  | SNP     | G        | G        | A   | ANOS.NM_213599.exon4:c.173G><br>A.p.R58Q                  | 47.22 | NM_213599    |
| PSMD13   | O2 | 11 | 251559    | 251559    | Misense_Mutation  | SNP     | G        | G        | C   | PSMD13.NM_175932.exon9:c.857<br>G>C.p.R266P               | 40    | NM_175932    |
| FLG      | O2 | 1  | 152280736 | 152280736 | Misense_Mutation  | SNP     | T        | T        | C   | FLG.NM_002016.exon3:c.6626A><br>G.p.H2209R                | 25    | NM_002016    |
| OR4A16   | O2 | 11 | 5511584   | 5511584   | Misense_Mutation  | SNP     | A        | A        | T   | OR4A16.NM_001605274.exon1:c.<br>908A>T.p.K203M            | 44.26 | NM_001605274 |
| UBQLN3   | O2 | 11 | 5529465   | 5529465   | Misense_Mutation  | SNP     | G        | G        | T   | UBQLN3.NM_017481.exon2:c.132<br>4C>A.p.P442T              | 36.14 | NM_017481    |
| SPTA1    | O2 | 1  | 158584091 | 158584091 | Misense_Mutation  | SNP     | A        | A        | G   | SPTA1.NM_001286237.exon2:c.6794<br>T>C.p.D265T            | 35.71 | NM_001286237 |
| PRG4     | O2 | 1  | 186273994 | 186273994 | Misense_Mutation  | SNP     | C        | C        | T   | PRG4.NM_006807.exon6:c.538C><br>T.p.R180W                 | 51.11 | NM_006807    |
| CFH      | O2 | 1  | 196695937 | 196695937 | Misense_Mutation  | SNP     | G        | G        | T   | CFH.NM_000186.exon14:c.2103G><br>>T.p.W701C               | 12.35 | NM_000186    |
| TMCC2    | O2 | 1  | 205241235 | 205241235 | Misense_Mutation  | SNP     | G        | G        | A   | TMCC2.NM_014858.exon5:c.2113<br>G>A.p.V705M               | 24.29 | NM_014858    |
| SRRM4    | O2 | 12 | 119563214 | 119563214 | Misense_Mutation  | SNP     | C        | C        | T   | SRRM4.NM_194286.exon7:c.544C><br>>T.p.R162C               | 16.13 | NM_194286    |
| PK3CG2   | O2 | 12 | 18435399  | 18435401  | In_Frame_Del      | DEL     | CCC      | CCC      | -   | PK3CG2.NM_001288772.exon2:c.<br>385_387delCCC.p.P129del   | 36.9  | NM_001288772 |
| PK3CG2   | O2 | 12 | 18435452  | 18435452  | Misense_Mutation  | SNP     | C        | C        | T   | PK3CG2.NM_001288772.exon2:c.<br>437C>T.p.P146L            | 35.62 | NM_001288772 |
| SOXS     | O2 | 12 | 23716305  | 23716305  | Misense_Mutation  | SNP     | C        | C        | T   | SOXS.NM_006940.exon11:c.1375<br>G>A.p.A499I               | 26.4  | NM_006940    |
| MRPS35   | O2 | 12 | 27867727  | 27867727  | Misense_Mutation  | SNP     | G        | G        | A   | MRPS35.NM_001821.exon2:c.127<br>G>A.p.G43R                | 40.58 | NM_001821    |
| MBD6     | O2 | 12 | 57918525  | 57918525  | Misense_Mutation  | SNP     | T        | T        | C   | MBD6.NM_052897.exon4:c.136T><br>C>G.p.S46P                | 36.92 | NM_052897    |
| CD163L1  | O2 | 12 | 7548793   | 7548793   | Misense_Mutation  | SNP     | C        | C        | T   | CD163L1.NM_001297650.exon8:c.<br>1978G>A.p.V660I          | 36.8  | NM_001297650 |
| WNK1     | O2 | 12 | 970483    | 970483    | Misense_Mutation  | SNP     | A        | A        | G   | WNK1.NM_213655.exon7:c.1925A><br>G>G.p.R420C              | 34.62 | NM_213655    |
| PROSER1  | O2 | 13 | 39600487  | 39600489  | In_Frame_Del      | DEL     | ATC      | ATC      | -   | PROSER1.NM_025138.exon6:c.40<br>5_407delGAT.p.M135del     | 10.99 | NM_025138    |
| SETD8    | O2 | 13 | 50057097  | 50057097  | Misense_Mutation  | SNP     | G        | G        | A   | SETD8.NM_031915.exon10:c.14<br>17G>A.p.V473M              | 59.32 | NM_031915    |
| KLF12    | O2 | 13 | 74339129  | 74339129  | Misense_Mutation  | SNP     | G        | G        | A   | KLF12.NM_007249.exon6:c.815C><br>T.p.P272L                | 28.77 | NM_007249    |
| CLN5     | O2 | 13 | 77566090  | 77566090  | Misense_Mutation  | SNP     | C        | C        | T   | CLN5.NM_006493.exon1:c.4C>T.p.<br>R2C                     | 42.86 | NM_006493    |
| OXGR1    | O2 | 13 | 97639622  | 97639622  | Misense_Mutation  | SNP     | C        | C        | T   | OXGR1.NM_080818.exon4:c.392G><br>>A.p.R131H               | 52.78 | NM_080818    |
| PLD4     | O2 | 14 | 10538401  | 10538401  | Misense_Mutation  | SNP     | G        | G        | A   | PLD4.NM_001308174.exon9:c.113<br>2G>A.p.V378M             | 46.15 | NM_001308174 |
| C14orf39 | O2 | 14 | 6032724   | 6032724   | Misense_Mutation  | SNP     | G        | G        | T   | C14orf39.NM_174978.exon11:c.94<br>6C>A.p.D31E             | 46.15 | NM_174978    |
| PHGR1    | O2 | 15 | 40648396  | 40648396  | Misense_Mutation  | COMPLEX | TGG      | TGG      | CCA | PHGR1.NM_001456433.exon3:c.1<br>41_143delTGTGGTCCA.p.G48H | 21.05 | NM_001456433 |
| KNL1     | O2 | 15 | 40920871  | 40920872  | Frame_Shift_Ins   | INS     | -        | -        | G   | KNL1.NM_170589.exon13:c.5658del<br>upG.p.E1887fs          | 24.11 | NM_170589    |
| ADAMTSL3 | O2 | 15 | 84611480  | 84611480  | Nonsense_Mutation | SNP     | C        | C        | T   | ADAMTSL3.NM_207517.exon18:c.<br>2230C>T.p.R744*           | 38.89 | NM_207517    |
| SCNN1B   | O2 | 16 | 23391982  | 23391982  | Misense_Mutation  | SNP     | G        | G        | C   | SCNN1B.NM_000336.exon13:c.17<br>83G>C.p.A596P             | 22.58 | NM_000336    |
| WLS      | O2 | 1  | 68614286  | 68614286  | Misense_Mutation  | SNP     | C        | C        | T   | WLS.NM_001002292.exon7:c.102<br>4G>A.p.V342I              | 29.03 | NM_001002292 |
| MYO15A   | O2 | 17 | 18024806  | 18024806  | Misense_Mutation  | SNP     | G        | G        | A   | MYO15A.NM_016239.exon2:c.269<br>2G>A.p.G898R              | 28.26 | NM_016239    |
| UTP8     | O2 | 17 | 30222002  | 30222002  | Misense_Mutation  | SNP     | T        | T        | C   | UTP8.NM_018428.exon3:c.206A><br>G.p.Q69R                  | 62.5  | NM_018428    |
| ARRB2    | O2 | 17 | 4619845   | 4619845   | Misense_Mutation  | SNP     | G        | G        | A   | ARRB2.NM_001257328.exon5:c.2<br>99G>A.p.R102H             | 31.88 | NM_001257328 |
| AXIN2    | O2 | 17 | 63554666  | 63554666  | Misense_Mutation  | SNP     | G        | G        | A   | AXIN2.NM_004655.exon2:c.73C>T<br>p.P25S                   | 64.29 | NM_004655    |
| ABCA6    | O2 | 17 | 67125840  | 67125840  | Misense_Mutation  | SNP     | C        | C        | T   | ABCA6.NM_080284.exon7:c.844G><br>>A.p.V282I               | 22.92 | NM_080284    |
| CTC1     | O2 | 17 | 8134748   | 8134748   | Frame_Shift_Ins   | DEL     | A        | A        | -   | CTC1.NM_020599.exon15:c.2515del<br>TT.p.S83fs             | 21.05 | NM_020599    |
| COL24A1  | O2 | 1  | 86512536  | 86512536  | Misense_Mutation  | SNP     | C        | C        | T   | COL24A1.NM_152890.exon12:c.1<br>922G>A.p.R641H            | 40.74 | NM_152890    |
| CBLN2    | O2 | 18 | 70209101  | 70209101  | Misense_Mutation  | SNP     | G        | G        | A   | CBLN2.NM_152611.exon3:c.296C><br>>T.p.R99W                | 32.1  | NM_152611    |
| SALL3    | O2 | 18 | 76754818  | 76754818  | Misense_Mutation  | SNP     | G        | G        | A   | SALL3.NM_171999.exon2:c.2827G><br>>A.p.A843T              | 12.77 | NM_171999    |
| ZNF728   | O2 | 19 | 23159486  | 23159486  | Misense_Mutation  | SNP     | T        | T        | C   | ZNF728.NM_001267716.exon4:c.6<br>53A>G.p.Y218C            | 60    | NM_001267716 |
| TMEM147  | O2 | 19 | 36038036  | 36038036  | Misense_Mutation  | SNP     | G        | G        | A   | TMEM147.NM_032635.exon6:c.44<br>55G>A.p.A148T             | 27.12 | NM_032635    |
| NLRP2    | O2 | 19 | 55494753  | 55494753  | Misense_Mutation  | SNP     | G        | G        | A   | NLRP2.NM_017852.exon6:c.168T><br>G>A.p.E583K              | 31.71 | NM_017852    |
| ZSCAN5B  | O2 | 19 | 56703269  | 56703269  | Misense_Mutation  | SNP     | G        | G        | A   | ZSCAN5B.NM_00180456.exon2:c.<br>538G>T.p.R16C             | 31.94 | NM_00180456  |
| RAD21L1  | O2 | 20 | 1214814   | 1214814   | Misense_Mutation  | SNP     | A        | A        | C   | RAD21L1.NM_001136566.exon5:c.<br>454A>C.p.I               |       |              |

|          |    |    |           |           |                   |         |                        |                      |    |                                                                          |       |              |
|----------|----|----|-----------|-----------|-------------------|---------|------------------------|----------------------|----|--------------------------------------------------------------------------|-------|--------------|
| ANKRD36  | O2 | 2  | 97877292  | 97877292  | Misense_Mutation  | SNP     | C                      | C                    | T  | ANKRD36:NM_001164315:exon57<br>c.3977C>T:p.P1126L                        | 57.14 | NM_001164315 |
| TMP4     | O2 | 3  | 12198364  | 12198364  | Misense_Mutation  | SNP     | C                      | C                    | T  | TMP4:NM_00256:exon3:c.308G><br>A:p.G103D                                 | 39    | NM_00256     |
| ZBX      | O2 | 3  | 167051769 | 167051769 | Misense_Mutation  | SNP     | T                      | T                    | C  | ZBX:NM_001199201:exon10:c.53<br>A>G:p.X178R                              | 58.82 | NM_001199201 |
| ORSH15   | O2 | 3  | 97888438  | 97888438  | Misense_Mutation  | SNP     | G                      | G                    | C  | ORSH15:NM_001005515:exon1:c.<br>895G>C:p.V299L                           | 40.91 | NM_001005515 |
| ORSH6    | O2 | 3  | 97983711  | 97983711  | Misense_Mutation  | SNP     | T                      | T                    | C  | ORSH6:NM_001005479:exon1:c.5<br>831T>C:p.C116R                           | 58.33 | NM_001005479 |
| CCDC110  | O2 | 4  | 186380243 | 186380243 | Misense_Mutation  | SNP     | A                      | A                    | C  | CCDC110:NM_152775:exon8:c.14<br>98T>G:p.Y50D                             | 44.58 | NM_152775    |
| KLKB1    | O2 | 4  | 187178473 | 187178473 | Misense_Mutation  | SNP     | G                      | G                    | A  | KLKB1:NM_000892:exon14:c.1679<br>C>G:p.R550Q                             | 42.37 | NM_000892    |
| CNGA1    | O2 | 4  | 47945286  | 47945286  | Nonsense_Mutation | SNP     | C                      | C                    | A  | CNGA1:NM_001142564:exon7:c.1675<br>68G>T:p.E190*                         | 11.76 | NM_001142564 |
| FRAS1    | O2 | 4  | 79367890  | 79367890  | Misense_Mutation  | SNP     | G                      | G                    | A  | FRAS1:NM_025074:exon4:c.5866<br>C>G:p.I1958I                             | 31.03 | NM_025074    |
| STPG2    | O2 | 4  | 99027184  | 99027184  | Misense_Mutation  | SNP     | T                      | T                    | C  | STPG2:NM_174952:exon5:c.532A<br>>G:p.I178V                               | 36.67 | NM_174952    |
| SPINK5   | O2 | 5  | 147499645 | 147499645 | Misense_Mutation  | SNP     | G                      | G                    | A  | SPINK5:NM_008486:exon25:c.238<br>T>C:p.R79Q                              | 30.3  | NM_008486    |
| NIPBL    | O2 | 5  | 37020625  | 37020625  | Misense_Mutation  | SNP     | T                      | T                    | C  | NIPBL:NM_133433:exon26:c.5075<br>T>C:p.M1692T                            | 23.53 | NM_133433    |
| ADAMTS6  | O2 | 5  | 64756126  | 64756126  | Misense_Mutation  | SNP     | C                      | C                    | T  | ADAMTS6:NM_197941:exon4:c.50<br>C>G:p.R168R                              | 30.26 | NM_197941    |
| POCS     | O2 | 5  | 7501582   | 7501582   | Misense_Mutation  | SNP     | A                      | A                    | G  | POCS:NM_001099271:exon4:c.25<br>4T>C:p.I85T                              | 38.64 | NM_001099271 |
| TRDN     | O2 | 6  | 123686766 | 123686766 | Misense_Mutation  | SNP     | G                      | G                    | T  | TRDN:NM_00607:exon19:c.1257<br>C>G:p.E119K                               | 39.29 | NM_006073    |
| RSPH3    | O2 | 6  | 153939348 | 153939348 | Misense_Mutation  | SNP     | A                      | A                    | G  | RSPH3:NM_031924:exon7:c.1316<br>T>C:p.M439T                              | 54.84 | NM_031924    |
| MUC22    | O2 | 6  | 30996839  | 30996839  | Misense_Mutation  | SNP     | G                      | G                    | A  | MUC22:NM_00122469:exon3:c.3<br>640G>A:p.E1214K                           | 15.19 | NM_00122469  |
| MPG1     | O2 | 6  | 76631823  | 76631823  | Misense_Mutation  | SNP     | C                      | C                    | T  | MPG1:NM_001563:exon17:c.2377<br>G>A:p.D793N                              | 45.45 | NM_001563    |
| MCALL2   | O2 | 7  | 14786111  | 14786111  | Misense_Mutation  | SNP     | G                      | G                    | A  | MCALL2:NM_102524:exon10:c.19<br>87C>T:p.R63C                             | 18.6  | NM_102524    |
| PKD1L1   | O2 | 7  | 47917119  | 47917119  | Misense_Mutation  | SNP     | C                      | C                    | T  | PKD1L1:NM_138295:exon22:c.383<br>T>G>A:p.I1211                           | 24.22 | NM_138295    |
| ZNF735   | O2 | 7  | 63880098  | 63880098  | Misense_Mutation  | COMPLEX | CC                     | CC                   | TA | ZNF735:NM_00159252:exon4:c.6<br>66_670delCCTcA>T:p.H224N                 | 69.23 | NM_00159254  |
| GUSB     | O2 | 7  | 65441045  | 65441045  | Misense_Mutation  | SNP     | G                      | G                    | A  | GUSB:NM_000181:exon5:c.869C><br>T:p.P290L                                | 26.89 | NM_000181    |
| ABCB4    | O2 | 7  | 87074281  | 87074282  | Frame_Shift_Ins   | INS     | -                      | -                    | A  | ABCB4:NM_018849:exon10:c.101<br>5dupT:p.S339fs                           | 10.29 | NM_018849    |
| PUF60    | O2 | 8  | 144899294 | 144899294 | Misense_Mutation  | SNP     | G                      | G                    | C  | PUF60:NM_078480:exon11:c.1166<br>C>G:p.P989R                             | 42.86 | NM_078480    |
| FOCAD    | O2 | 9  | 20819889  | 20819889  | Misense_Mutation  | SNP     | G                      | G                    | T  | FOCAD:NM_017794:exon14:c.155<br>GG>T:p.G517V                             | 35.85 | NM_017794    |
| RORB     | O2 | 9  | 77257699  | 77257699  | Misense_Mutation  | SNP     | A                      | A                    | G  | RORB:NM_006914:exon4:c.605A><br>G:p.Q202K                                | 31.39 | NM_006914    |
| ZNF750   | O2 | X  | 134421241 | 134421241 | Misense_Mutation  | SNP     | C                      | C                    | T  | ZNF750:NM_007131:exon7:c.1581<br>G>A:p.C454Y                             | 22.81 | NM_007131    |
| WSCD2    | O3 | 12 | 108603974 | 108603974 | Misense_Mutation  | SNP     | G                      | G                    | A  | WSCD2:NM_014653:exon4:c.574<br>C>G:p.E119K                               | 13.33 | NM_014653    |
| OBSCN    | O3 | 1  | 22844454  | 22844454  | Misense_Mutation  | SNP     | C                      | C                    | T  | OBSCN:NM_001271223:exon16:c.<br>4688C>T:p.T1563M                         | 49.02 | NM_001271223 |
| WDR59    | O3 | 16 | 74955991  | 74955991  | Misense_Mutation  | SNP     | T                      | T                    | C  | WDR59:NM_005918:exon10:c.740<br>A>G:p.K247S                              | 7.69  | NM_005918    |
| APC      | O3 | 5  | 112173917 | 112173917 | Nonsense_Mutation | SNP     | C                      | C                    | T  | APC:NM_000038:exon16:c.2626C<br>>T:p.R876*                               | 39.16 | NM_000038    |
| APC      | O3 | 5  | 112175618 | 112175618 | Frame_Shift_Ins   | DEL     | C                      | C                    | -  | APC:NM_000038:exon16:c.4328de<br>C>p.P1443fs                             | 33.33 | NM_000038    |
| PITRM1   | O3 | 10 | 3208567   | 3208568   | Frame_Shift_Ins   | INS     | -                      | -                    | -  | PITRM1:NM_001242307:exon4:c.2<br>71_272insCATTCTCTCTCTCTCC               | 27.27 | NM_001242307 |
| FAM208B  | O3 | 10 | 5804509   | 5804509   | Misense_Mutation  | SNP     | C                      | C                    | T  | TAGCGTGC>p.D91fs<br>FAM208B:NM_017782:exon20:c.7<br>189C>T:p.P239T       | 39.47 | NM_017782    |
| KF20B    | O3 | 10 | 91488979  | 91488979  | Misense_Mutation  | SNP     | A                      | A                    | T  | KF20B:NM_001284259:exon18:c.<br>2266A>T:p.H78L                           | 42.86 | NM_001284259 |
| CEP164   | O3 | 11 | 117262952 | 117262952 | Misense_Mutation  | SNP     | C                      | C                    | T  | CEP164:NM_014956:exon18:c.229<br>4C>T:p.T765M                            | 30.77 | NM_014956    |
| IGSF3    | O3 | 1  | 117122288 | 117122288 | Misense_Mutation  | SNP     | G                      | G                    | C  | IGSF3:NM_001542:exon10:c.3120<br>C>G:p.D104E                             | 22.73 | NM_001542    |
| LMNA     | O3 | 1  | 156108328 | 156108328 | Misense_Mutation  | SNP     | C                      | C                    | T  | LMNA:NM_170707:exon11:c.1748<br>C>T:p.S83L                               | 32.26 | NM_170707    |
| DGAT2    | O3 | 11 | 75508371  | 75508371  | Misense_Mutation  | SNP     | G                      | G                    | A  | DGAT2:NM_002566:exon6:c.803G<br>>A:p.R289H                               | 35    | NM_002566    |
| IKBKE    | O3 | 1  | 206669465 | 206669465 | Misense_Mutation  | SNP     | C                      | C                    | T  | IKBKE:NM_014002:exon2:c.2138<br>C>T:p.P713L                              | 50    | NM_014002    |
| DPF3     | O3 | 14 | 73137968  | 73137968  | Misense_Mutation  | SNP     | G                      | G                    | A  | DPF3:NM_001260544:exon9:c.111<br>GC>T:p.I378M                            | 11.81 | NM_001260544 |
| C15orf39 | O3 | 15 | 75499490  | 75499490  | Misense_Mutation  | SNP     | C                      | C                    | G  | C15orf39:NM_015492:exon2:c.110<br>1C>G:p.C387W                           | 43.21 | NM_015492    |
| DNAH3    | O3 | 16 | 20990740  | 20990740  | Misense_Mutation  | SNP     | G                      | G                    | A  | DNAH3:NM_017539:exon50:c.798<br>GC>T:p.T663M                             | 38.98 | NM_017539    |
| CDHS     | O3 | 16 | 66436606  | 66436606  | Misense_Mutation  | SNP     | C                      | C                    | T  | CDHS:NM_001795:exon12:c.1889<br>C>T:p.A630V                              | 11.7  | NM_001795    |
| MYPH2    | O3 | 17 | 10424632  | 10424632  | Misense_Mutation  | SNP     | G                      | G                    | A  | MYPH2:NM_017544:exon40:c.5791<br>G>T:p.R1931V                            | 22.22 | NM_017534    |
| COX10    | O3 | 17 | 14110412  | 14110412  | Misense_Mutation  | SNP     | G                      | G                    | A  | COX10:NM_001303:exon7:c.1214<br>G>A:p.R405H                              | 26.58 | NM_001303    |
| UNC45B   | O3 | 17 | 33495289  | 33495289  | Misense_Mutation  | SNP     | G                      | G                    | A  | UNC45B:NM_173167:exon9:c.136<br>T>G>A:p.R454H                            | 43.14 | NM_173167    |
| COG1     | O3 | 17 | 71197890  | 71197890  | Misense_Mutation  | SNP     | C                      | C                    | A  | COG1:NM_018714:exon7:c.1924C<br>>A:p.P642T                               | 31.67 | NM_018714    |
| ATP8B3   | O3 | 19 | 1785539   | 1785539   | Misense_Mutation  | SNP     | C                      | C                    | T  | ATP8B3:NM_13813:exon36:c.332<br>2G>A:p.A1106T                            | 24.18 | NM_138813    |
| SPTBN4   | O3 | 19 | 41018705  | 41018705  | Misense_Mutation  | SNP     | C                      | C                    | T  | SPTBN4:NM_020971:exon14:c.20<br>69C>T:p.A670V                            | 66.67 | NM_020971    |
| MADCAM1  | O3 | 19 | 501701    | 501701    | Misense_Mutation  | SNP     | G                      | G                    | A  | MADCAM1:NM_130760:exon4:c.7<br>90G>A:p.D244N                             | 44.74 | NM_130760    |
| MADCAM1  | O3 | 19 | 501725    | 501725    | Misense_Mutation  | SNP     | G                      | G                    | A  | MADCAM1:NM_130760:exon4:c.7<br>24G>A:p.D242N                             | 54.55 | NM_130760    |
| TSKS     | O3 | 19 | 50249823  | 50249840  | In_Frame_Del      | DEL     | CCTCCGGCTTC<br>TGCTTCT | CCTCCGGCTTC<br>CTTCT | -  | TSKS:NM_001713:exon5:c.779-79<br>6delAGAGACGAGCCGGAGG>p.<br>E260_E265del | 15.63 | NM_001713    |
| SPTLC3   | O3 | 20 | 13145453  | 13145453  | Misense_Mutation  | SNP     | G                      | G                    | A  | SPTLC3:NM_018327:exon12:c.159<br>8G>A:p.R533Q                            | 22.37 | NM_018327    |
| NCOA6    | O3 | 20 | 33338227  | 33338227  | Misense_Mutation  | SNP     | T                      | T                    | C  | NCOA6:NM_014071:exon9:c.1771<br>A>G:p.M591V                              | 11.9  | NM_014071    |
| RTEL1    | O3 | 20 | 62298844  | 62298844  | Misense_Mutation  | SNP     | C                      | C                    | T  | RTEL1:NM_001283099:exon6:c.63<br>G>C:p.R191W                             | 13.04 | NM_001283099 |
| GLI2     | O3 | 2  | 121726395 | 121726395 | Misense_Mutation  | SNP     | G                      | G                    | A  | GLI2:NM_005270:exon5:c.749G>A<br>p.R250H                                 | 26.6  | NM_005270    |
| SAP130   | O3 | 2  | 128773988 | 128773988 | Misense_Mutation  | SNP     | G                      | G                    | A  | SAP130:NM_00146928:exon4:c.5<br>60C>T:p.P181L                            | 36.49 | NM_00146928  |
| URB1     | O3 | 21 | 33694176  | 33694176  | Misense_Mutation  | SNP     | G                      | G                    | A  | URB1:NM_014825:exon34:c.5419<br>C>T:p.R1807W                             | 42.25 | NM_014825    |
| P2RX8    | O3 | 22 | 21377288  | 21377288  | Nonsense_Mutation | SNP     | G                      | G                    | A  | P2RX8:NM_005446:exon5:c.521G<br>>A:p.W174*                               | 49.21 | NM_005446    |
| TMEM247  | O3 | 2  | 46707851  | 46707851  | Misense_Mutation  | SNP     | G                      | G                    | A  | TMEM247:NM_001145051:exon2:c.<br>425G>A:p.R142Q                          | 55.26 | NM_001145051 |
| CCDC80   | O3 | 3  | 112358175 | 112358175 | Misense_Mutation  | SNP     | G                      | G                    | A  | CCDC80:NM_199511:exon2:c.578<br>C>T:p.A193V                              | 43.82 | NM_199511    |
| WNT5A    | O3 | 3  | 55504410  | 55504410  | Misense_Mutation  | SNP     | C                      | C                    | T  | WNT5A:NM_003382:exon5:c.853G<br>>A:p.V289I                               | 46.15 | NM_003382    |
| C4orf47  | O3 | 4  | 186361716 | 186361716 | Misense_Mutation  | SNP     | G                      | G                    | A  | C4orf47:NM_00114357:exon5:c.5<br>57G>A:p.R186H                           | 17.65 | NM_00114357  |
| VARS     | O3 | 6  | 31762844  | 31762844  | Misense_Mutation  | SNP     | G                      | G                    | T  | VARS:NM_006295:exon2:c.151C><br>p.P51T                                   | 12    | NM_006295    |
| IRF4     | O3 | 6  | 395933    | 395933    | Misense_Mutation  | SNP     | C                      | C                    | A  | IRF4:NM_002490:exon4:c.490C>A<br>p.Q164K                                 | 30    | NM_002460    |
| RBMXL3   | O3 | X  | 114425196 | 114425196 | Misense_Mutation  | SNP     | G                      | G                    | A  | RBMXL3:NM_001145346:exon1:c.<br>1192G>A:p.D398N                          | 44.33 | NM_001145346 |
| TENM1    | O3 | X  | 123518158 | 123518158 | Misense_Mutation  | SNP     | C                      | C                    | T  | TENM1:NM_001163278:exon30:c.<br>662G>A:p.R2208H                          | 12.9  | NM_001163278 |
| EGR2     | O4 | 10 | 64574154  | 64574154  | Misense_Mutation  | SNP     | C                      | C                    | T  | EGR2:NM_000399:exon2:c.244G><br>A:p.V62I                                 | 21.58 | NM_000399    |
| AMOTL1   | O4 | 11 | 9458333   | 9458333   | Misense_Mutation  | SNP     | G                      | G                    | A  | AMOTL1:NM_136847:exon7:c.170<br>3G>A:p.R58Q                              | 23.81 | NM_130847    |
| STAB2    | O4 | 12 | 104105290 | 104105290 | Misense_Mutation  | SNP     | G                      | G                    | A  | STAB2:NM_017584:exon40:c.4330<br>C>A:p.A1444T                            | 45.35 | NM_017584    |
| KRAS     | O4 | 12 | 25398265  | 25398265  | Misense_Mutation  | SNP     | C                      | C                    | A  | KRAS:NM_003390:exon2:c.34G>T<br>p.G12C                                   | 13.64 | NM_003390    |
| FBXW7    | O4 | 14 | 153245447 | 153245447 | Misense_Mutation  | SNP     | A                      | A                    | G  | FBXW7:NM_003352:exon11:c.174<br>47C>G:p.S582P                            | 19.35 | NM_003352    |
| APC      | O4 | 5  | 112173917 | 112173917 | Nonsense_Mutation | SNP     | C                      | C                    | T  | APC:NM_000038:exon16:c.2626C<br>>T:p.R876*                               | 38.3  | NM_000038    |
| APC      | O4 | 5  | 112175639 | 112175639 | Nonsense_Mutation | SNP     | C                      | C                    | T  | APC:NM_000038:exon16:c.4348C<br>>T:p.R1450*                              | 60    | NM_000038    |
| INA      | O4 | 10 | 105037815 | 105037815 | Misense_Mutation  | SNP     | G                      | G                    | A  | INA:NM_032727:exon1:c.847G>A<br>p.A283T                                  | 14.94 | NM_032727    |
| SFRP5    | O4 | 10 | 99531229  | 99531229  | Misense_Mutation  |         |                        |                      |    |                                                                          |       |              |

|           |    |    |           |           |                   |     |        |        |   |                                                                             |       |              |
|-----------|----|----|-----------|-----------|-------------------|-----|--------|--------|---|-----------------------------------------------------------------------------|-------|--------------|
| IVL       | O4 | 1  | 15283680  | 15283680  | Misense_Mutation  | SNP | A      | A      | T | IVL.NM_005547:exon2:c.1407A>T:p.C49H                                        | 56.6  | NM_005547    |
| OR51B2    | O4 | 11 | 5345158   | 5345158   | Misense_Mutation  | SNP | T      | T      | C | OR51B2.NM_033180:exon1:c.370A>G:p.I124V                                     | 44.68 | NM_033180    |
| NES       | O4 | 1  | 156642748 | 156642748 | In_Frame_Del      | DEL | GAG    | GAG    | - | NES.NM_006617:exon4:c.1232_1234delCTC:p.P411del                             | 43.75 | NM_006617    |
| PTPRC     | O4 | 1  | 198672442 | 198672442 | Misense_Mutation  | SNP | C      | C      | G | PTPRC.NM_002638:exon7:c.599C>G:p.A200G                                      | 18.31 | NM_002638    |
| ELF3      | O4 | 1  | 201983002 | 201983003 | Frame_Shift_Ins   | INS | -      | -      | C | ELF3.NM_004433:exon8:c.853dupC>A:p.H555E                                    | 20.69 | NM_004433    |
| PITPNM2   | O4 | 12 | 123485694 | 123485694 | Misense_Mutation  | SNP | C      | C      | G | PITPNM2.NM_020845:exon6:c.106GG>C:p.D354H                                   | 39.34 | NM_020845    |
| SMYD2     | O4 | 1  | 214504326 | 214504326 | Misense_Mutation  | SNP | G      | G      | A | SMYD2.NM_020197:exon9:c.850G>A:p.D384N                                      | 38.95 | NM_020197    |
| CAPZA3    | O4 | 12 | 18891215  | 18891215  | Misense_Mutation  | SNP | C      | C      | T | CAPZA3.NM_033328:exon1:c.13G>A:p.V5M                                        | 41.18 | NM_033328    |
| CACNA2D4  | O4 | 12 | 1993428   | 1993428   | Nonsense_Mutation | SNP | C      | C      | T | CACNA2D4.NM_117284:exon12:c.132C>A:p.W444                                   | 28.3  | NM_117284    |
| NPAS3     | O4 | 14 | 3429079   | 3429079   | Misense_Mutation  | SNP | C      | C      | A | NPAS3.NM_001647:exon12:c.1566C>A:p.N52K                                     | 24.16 | NM_00164749  |
| ZYG11B    | O4 | 1  | 53282301  | 53282301  | Misense_Mutation  | SNP | C      | C      | T | ZYG11B.NM_024648:exon13:c.204A>T:p.F682S                                    | 25.86 | NM_024648    |
| MEFV      | O4 | 16 | 3306524   | 3306524   | Misense_Mutation  | SNP | C      | C      | T | MEFV.NM_000243:exon1:c.64G>A:p.E22K                                         | 24    | NM_000243    |
| SLC2A7    | O4 | 1  | 9073810   | 9073810   | Misense_Mutation  | SNP | C      | C      | T | SLC2A7.NM_007420:exon8:c.988C>G:p.I330I                                     | 28.21 | NM_007420    |
| FCHO1     | O4 | 19 | 17875219  | 17875219  | Misense_Mutation  | SNP | C      | C      | T | FCHO1.NM_001161:exon6:c.155C>T:p.A52V                                       | 34.62 | NM_001161357 |
| GMP       | O4 | 19 | 19747825  | 19747825  | Misense_Mutation  | SNP | T      | T      | C | GMP.NM_016573:exon12:c.1138A>G:p.I380V                                      | 65    | NM_016573    |
| MADCAM1   | O4 | 19 | 501719    | 501719    | Misense_Mutation  | SNP | T      | T      | C | MADCAM1.NM_130760:exon4:c.718T>C:p.S24P                                     | 65.79 | NM_130760    |
| ZNF446    | O4 | 19 | 58991828  | 58991828  | Misense_Mutation  | SNP | C      | C      | T | ZNF446.NM_017908:exon7:c.1088C>T:p.P363L                                    | 43.93 | NM_017908    |
| TGM6      | O4 | 20 | 2384368   | 2384368   | Misense_Mutation  | SNP | G      | G      | A | TGM6.NM_198994:exon9:c.1236G>A:p.R412H                                      | 54.35 | NM_198994    |
| FAM83D    | O4 | 20 | 37555158  | 37555158  | Misense_Mutation  | SNP | A      | A      | G | FAM83D.NM_030919:exon1:c.73A>G:p.T5A                                        | 47.37 | NM_030919    |
| RIPOR3    | O4 | 20 | 49219025  | 49219025  | Misense_Mutation  | SNP | G      | G      | A | RIPOR3.NM_001290:exon13:c.1243C>T:p.P415S                                   | 33.33 | NM_001290268 |
| NEB       | O4 | 2  | 15250339  | 15250339  | Misense_Mutation  | SNP | C      | C      | A | NEB.NM_001271:exon45:c.5486G>T:p.I1829V                                     | 13.43 | NM_001271208 |
| GIGY2     | O4 | 2  | 23366081  | 23366081  | Misense_Mutation  | SNP | A      | A      | G | GIGY2.NM_001031:exon16:c.1652A>G:p.H551R                                    | 46.07 | NM_00103147  |
| SYCE3     | O4 | 22 | 50994763  | 50994763  | Misense_Mutation  | SNP | C      | C      | T | SYCE3.NM_001222:exon2:c.72C>A:p.D24E                                        | 25.23 | NM_00122225  |
| BIRC6     | O4 | 2  | 32823018  | 32823018  | Nonsense_Mutation | SNP | C      | C      | T | BIRC6.NM_016252:exon6:c.1381A>C>T:p.R460*                                   | 25.71 | NM_016252    |
| POLE4     | O4 | 2  | 75185873  | 75185873  | Misense_Mutation  | SNP | G      | G      | A | POLE4.NM_019890:exon1:c.67G>A:p.A23T                                        | 28.57 | NM_019896    |
| CTNNA2    | O4 | 2  | 80782889  | 80782889  | Misense_Mutation  | SNP | C      | C      | T | CTNNA2.NM_001282:exon12:c.1612C>T:p.R538W                                   | 24.49 | NM_001282597 |
| NLGN1     | O4 | 3  | 17399554  | 17399554  | Misense_Mutation  | SNP | C      | C      | T | NLGN1.NM_014652:exon7:c.1933C>T:p.P645S                                     | 47.4  | NM_014932    |
| FBXW7     | O4 | 4  | 15325998  | 15325998  | Nonsense_Mutation | SNP | C      | C      | A | FBXW7.NM_003365:exon8:c.817G>T>E:p.E27*                                     | 25.5  | NM_033632    |
| TMPRSS11F | O4 | 4  | 68930524  | 68930524  | Misense_Mutation  | SNP | C      | C      | A | TMPRSS11F.NM_007407:exon8:c.894G>T:p.Q288H                                  | 12.5  | NM_007407    |
| CWC27     | O4 | 5  | 64097145  | 64097145  | Misense_Mutation  | SNP | C      | C      | G | CWC27.NM_005865:exon9:c.766C>G:p.S55A                                       | 23.81 | NM_005869    |
| TAGAP     | O4 | 6  | 159457709 | 159457709 | Misense_Mutation  | SNP | G      | G      | A | TAGAP.NM_054114:exon10:c.1346C>T:p.S449L                                    | 30.26 | NM_054114    |
| FLNC      | O4 | 7  | 128490905 | 128490905 | Misense_Mutation  | SNP | A      | A      | T | FLNC.NM_001458:exon33:c.5447A>T:p.D1816V                                    | 19.4  | NM_001458    |
| ETV1      | O4 | 7  | 13940436  | 13940436  | Misense_Mutation  | SNP | T      | T      | C | ETV1.NM_004956:exon13:c.1138A>G:p.N380S                                     | 44.78 | NM_004956    |
| KEL       | O4 | 7  | 14265828  | 14265828  | Misense_Mutation  | SNP | C      | C      | T | KEL.NM_000420:exon3:c.142G>A:p.V48M                                         | 60.61 | NM_000420    |
| MIOS      | O4 | 7  | 7613204   | 7613204   | Misense_Mutation  | SNP | A      | A      | C | MIOS.NM_019005:exon4:c.1098A>C:p.L366F                                      | 32.14 | NM_019005    |
| PLOL      | O4 | 7  | 82784832  | 82784832  | Misense_Mutation  | SNP | C      | C      | G | PLOL.NM_030206:exon2:c.1125G>C>A:p.Q75H                                     | 47.27 | NM_030206    |
| ODF1      | O4 | 8  | 103573006 | 103573006 | Misense_Mutation  | SNP | G      | G      | A | ODF1.NM_024410:exon2:c.647G>A:p.S218N                                       | 59.69 | NM_024410    |
| C3orf84   | O4 | 9  | 114500617 | 114500617 | Misense_Mutation  | SNP | A      | A      | G | C3orf84.NM_173521:exon10:c.1168T>C>G:p.S39P                                 | 40.74 | NM_173521    |
| TUB       | P1 | 11 | 8122144   | 8122144   | Misense_Mutation  | SNP | G      | G      | A | TUB.NM_003320:exon11:c.1376G>A:p.R459H                                      | 50    | NM_003320    |
| ABCC12    | P1 | 16 | 48149472  | 48149472  | Misense_Mutation  | SNP | G      | G      | A | ABCC12.NM_033228:exon13:c.1843C>T:p.R615C                                   | 18.1  | NM_033228    |
| GJC1      | P1 | 17 | 4282987   | 4282987   | Misense_Mutation  | SNP | G      | G      | A | GJC1.NM_005497:exon3:c.499C>T:p.R167W                                       | 31.82 | NM_005497    |
| TP53      | P1 | 17 | 7578203   | 7578203   | Misense_Mutation  | SNP | C      | C      | T | TP53.NM_005546:exon6:c.646G>A:p.V216M                                       | 56.1  | NM_000546    |
| SMAD4     | P1 | 18 | 48593466  | 48593466  | Misense_Mutation  | SNP | C      | C      | T | SMAD4.NM_005359:exon10:c.1217C>T:p.A406V                                    | 43.24 | NM_005359    |
| NRXN1     | P1 | 2  | 50850603  | 50850603  | Misense_Mutation  | SNP | G      | G      | T | NRXN1.NM_001135:exon7:c.1082C>A:p.A361D                                     | 7.91  | NM_001135659 |
| PRR23C    | P1 | 3  | 138762733 | 138762733 | Misense_Mutation  | SNP | G      | G      | A | PRR23C.NM_001134:exon1:c.730C>T:p.R244C                                     | 29.06 | NM_001134657 |
| APC       | P1 | 5  | 112175273 | 112175273 | Nonsense_Mutation | SNP | C      | C      | T | APC.NM_000308:exon16:c.3982C>T>T:p.Q132*                                    | 27.59 | NM_000308    |
| CFB       | P1 | 6  | 31915244  | 31915244  | Misense_Mutation  | SNP | C      | C      | T | CFB.NM_001710:exon4:c.804C>T:p.R202W                                        | 39.68 | NM_001710    |
| XPC       | P1 | 3  | 14219966  | 14219966  | In_Frame_Del      | DEL | CCT    | CCT    | - | XPC.NM_004628:exon1:c.101_103delAGG:p.E34del                                | 14.29 | NM_004628    |
| PRDM8     | P1 | 4  | 81123250  | 81123252  | In_Frame_Del      | DEL | GAG    | CAG    | - | PRDM8.NM_000228:exon10:c.649_651delAGC>G:p.G217del                          | 11.25 | NM_000226    |
| PODXL     | P1 | 7  | 13241030  | 13241035  | In_Frame_Del      | DEL | GGGCAG | GGCGAC | - | PODXL.NM_001011:exon11:c.84_88delGTGCC>C:p.S29_P30del                       | 50    | NM_001011811 |
| ITIH2     | P1 | 10 | 7773844   | 7773844   | Misense_Mutation  | SNP | C      | C      | T | ITIH2.NM_002216:exon13:c.1532C>T>T:p.T511M                                  | 26.79 | NM_002216    |
| SLC6A5    | P1 | 11 | 20622978  | 20622978  | Misense_Mutation  | SNP | G      | G      | A | SLC6A5.NM_004211:exon2:c.307G>A:p.A103T                                     | 15.38 | NM_004211    |
| FLG       | P1 | 1  | 152282560 | 152282560 | Misense_Mutation  | SNP | T      | T      | C | FLG.NM_002016:exon3:c.4802A>C:p.E1610G                                      | 19.51 | NM_002016    |
| MS4A8     | P1 | 11 | 60482518  | 60482518  | Misense_Mutation  | SNP | G      | G      | A | MS4A8.NM_031457:exon6:c.559G>A:p.V187M                                      | 25.71 | NM_031457    |
| SLC9C2    | P1 | 1  | 173493208 | 173493208 | Frame_Shift_Ins   | DEL | A      | A      | A | SLC9C2.NM_178527:exon21:c.254delT:p.L847E                                   | 30.36 | NM_178527    |
| OR2A74    | P1 | 11 | 74800712  | 74800712  | Misense_Mutation  | SNP | A      | A      | T | OR2A74.NM_001005:exon1:c.47T>A:p.F16Y                                       | 11.11 | NM_001005285 |
| KLRCA4    | P1 | 12 | 10560957  | 10560957  | Misense_Mutation  | SNP | T      | T      | C | KLRCA4.NM_013431:exon3:c.311A>G:p.N104S                                     | 46.15 | NM_013431    |
| SLOC1B3   | P1 | 12 | 21028266  | 21028267  | Frame_Shift_Ins   | INS | -      | -      | T | SLOC1B3.NM_019844:exon9:c.83_84dupT:p.P280fs                                | 27.81 | NM_019844    |
| CCDC31    | P1 | 12 | 28605426  | 28605426  | Misense_Mutation  | SNP | G      | G      | A | CCDC31.NM_018138:exon10:c.94GG>A:p.I91M                                     | 49.06 | NM_018138    |
| RYR2      | P1 | 1  | 237947838 | 237947838 | Misense_Mutation  | SNP | G      | G      | A | RYR2.NM_001035:exon9:c.12826G>A:p.V427M                                     | 34.44 | NM_001035    |
| KCNAS     | P1 | 12 | 5154893   | 5154893   | Misense_Mutation  | SNP | C      | C      | T | KCNAS.NM_002234:exon1:c.1580C>T:p.T527M                                     | 10.99 | NM_002234    |
| KRT2      | P1 | 12 | 53045603  | 53045604  | In_Frame_Ins      | INS | -      | -      | - | KRT2.NM_000423:exon1:c.323_324insTGGAGGGAGGGCGGCTT:p.F108_S109insGGGGGTTCCA | 10.26 | NM_000423    |
| KRT1      | P1 | 12 | 53069243  | 53069243  | Misense_Mutation  | SNP | T      | T      | C | KRT1.NM_005121:exon9:c.1669A>G:p.S557G                                      | 22.33 | NM_006121    |
| PTPRQ     | P1 | 12 | 80838175  | 80838175  | Misense_Mutation  | SNP | C      | C      | T | PTPRQ.NM_001450:exon1:c.5CC>T:p.T17I                                        | 39.02 | NM_00145026  |
| ZMYM6     | P1 | 1  | 35453270  | 35453273  | Frame_Shift_Ins   | DEL | AAGA   | AAGA   | - | ZMYM6.NM_007167:exon16:c.341_0_341_3delTCTT:p.F1137fs                       | 32.26 | NM_007167    |
| OR4N2     | P1 | 14 | 20296298  | 20296298  | Misense_Mutation  | SNP | G      | G      | A | OR4N2.NM_001004:exon2:c.69G>A:p.E23K                                        | 36.24 | NM_001004723 |
| C14orf39  | P1 | 14 | 60903757  | 60903757  | Misense_Mutation  | SNP | G      | G      | A | C14orf39.NM_174978:exon18:c.1570C>T:p.L524F                                 | 47.54 | NM_174978    |
| C14orf39  | P1 | 14 | 60932752  | 60932752  | Misense_Mutation  | SNP | G      | G      | A | C14orf39.NM_174978:exon11:c.917C>T:p.A395V                                  | 65.63 | NM_174978    |
| SNW1      | P1 | 14 | 78189588  | 78189588  | Misense_Mutation  | SNP | G      | G      | A | SNW1.NM_001318:exon11:c.1066C>T:p.R356W                                     | 45    | NM_00131844  |
| BEND5     | P1 | 1  | 49224895  | 49224895  | Misense_Mutation  | SNP | C      | C      | T | BEND5.NM_004603:exon3:c.422G>A:p.R141C                                      | 28.18 | NM_024603    |
| ADAMTS7   | P1 | 15 | 79058622  | 79058622  | Misense_Mutation  | SNP | G      | G      | A | ADAMTS7.NM_014272:exon19:c.3631C>T:p.R121W                                  | 42.05 | NM_014272    |
| CACNA1H   | P1 | 16 | 1259312   | 1259312   | Misense_Mutation  | SNP | G      | G      | A | CACNA1H.NM_021098:exon17:c.3644G>A:p.R1215H                                 | 47.78 | NM_021098    |
| PDLT      | P1 | 16 | 20410533  | 20410533  | Misense_Mutation  | SNP | G      | G      | T | PDLT.NM_174924:exon2:c.90C>A:p.S30R                                         | 13.54 | NM_174924    |
| ARHGAP17  | P1 | 16 | 24942383  | 24942383  | Misense_Mutation  | SNP | C      | C      | A | ARHGAP17.NM_001008:exon1:c.2237G>T:p.G746V                                  | 22.93 | NM_001006634 |
| COG8      | P1 | 16 | 69370591  | 69370591  | Misense_Mutation  | SNP | C      | C      | A | COG8.NM_003282:exon2:c.402G>T:p.E134D                                       | 56.45 | NM_003282    |
| GPR157    | P1 | 1  | 9164626   | 9164626   | Misense_Mutation  | SNP | C      | C      | T | GPR157.NM_024980:exon4:c.860C>A:p.R287Q                                     | 17.07 | NM_024980    |
| IL12RB1   | P1 | 18 | 18188352  | 18188352  | Misense_Mutation  | SNP | G      | G      | A | IL12RB1.NM_005535:exon5:c.523C>T:p.R175W                                    | 35.48 | NM_005535    |
| CSNK1G2   | P1 | 19 | 1978973   | 1978973   | Misense_Mutation  | SNP | A      | A      | T | CSNK1G2.NM_001319:exon6:c.563A>T:p.D188V                                    | 16.57 | NM_001319    |
| Z         |    |    |           |           |                   |     |        |        |   |                                                                             |       |              |

|          |    |    |           |           |                   |     |                               |                               |   |                                                                         |       |              |
|----------|----|----|-----------|-----------|-------------------|-----|-------------------------------|-------------------------------|---|-------------------------------------------------------------------------|-------|--------------|
| DENN1C   | P1 | 19 | 6477251   | 6477251   | Frame_Shift_Ins   | DEL | G                             | G                             | - | DENN1C.NM_024898.exon8:c.49-196C>P.164As                                | 11.67 | NM_024898    |
| RALGAP2  | P1 | 20 | 20571844  | 20571844  | Misense_Mutation  | SNP | G                             | G                             | A | RALGAP2.NM_020343.exon17:c.2318C>T.P.773L                               | 25.88 | NM_020343    |
| MCM3AP   | P1 | 21 | 47695153  | 47695153  | Misense_Mutation  | SNP | G                             | G                             | A | MCM3AP.NM_003906.exon6:c.194-5C>T.P.R49W                                | 42.05 | NM_003906    |
| DNAH7    | P1 | 2  | 196851900 | 196851900 | Misense_Mutation  | SNP | C                             | C                             | T | DNAH7.NM_018887.exon14:c.164-4G>A.p.M548I                               | 40.3  | NM_018887    |
| DNAH7    | P1 | 2  | 196851911 | 196851911 | Misense_Mutation  | SNP | G                             | G                             | A | DNAH7.NM_018887.exon14:c.163-5C>T.P.R545C                               | 41.94 | NM_018887    |
| SPAG16   | P1 | 2  | 214149289 | 214149289 | Misense_Mutation  | SNP | G                             | G                             | T | SPAG16.NM_024532.exon1:c.82G>T.p.D28Y                                   | 45.98 | NM_024532    |
| SRRD     | P1 | 22 | 26879942  | 26879962  | In_Frame_Del      | DEL | GGAGGGAGGG<br>GGCCCGCCGG<br>G | GGAGGGAGGG<br>GGCCCGCCGG<br>G | - | SRRD.NM_001013694.exon1:c.90-110delGGAGGGGGGGGGGGGGGGGGAGG.p.E31_R37del | 31.71 | NM_001013694 |
| VPS54    | P1 | 2  | 64199317  | 64199317  | Misense_Mutation  | SNP | G                             | G                             | A | VPS54.NM_016516.exon4:c.440C>T.p.T147I                                  | 33.33 | NM_016516    |
| GCFC2    | P1 | 2  | 75923413  | 75923413  | Misense_Mutation  | SNP | T                             | T                             | C | GCFC2.NM_003033.exon5:c.746A>G.p.N248S                                  | 51.61 | NM_003033    |
| GUCA1C   | P1 | 3  | 108635036 | 108635036 | Misense_Mutation  | SNP | T                             | T                             | C | GUCA1C.NM_005459.exon3:c.380-1A>G.p.Q127R                               | 19.54 | NM_005459    |
| PLA1A    | P1 | 3  | 119338415 | 119338415 | Misense_Mutation  | SNP | G                             | G                             | T | PLA1A.NM_015900.exon8:c.928G>T.p.V310L                                  | 16.44 | NM_015900    |
| NPHP3    | P1 | 3  | 132402305 | 132402305 | Misense_Mutation  | SNP | C                             | C                             | G | NPHP3.NM_153240.exon25:c.383-4G>C.p.G1212R                              | 30.77 | NM_153240    |
| C3orf33  | P1 | 3  | 155520356 | 155520356 | Misense_Mutation  | SNP | C                             | C                             | T | C3orf33.NM_0198223.exon2:c.139G>A.p.A47T                                | 44.74 | NM_0198223   |
| SKL      | P1 | 3  | 170110135 | 170110135 | Misense_Mutation  | SNP | A                             | A                             | G | SKL.NM_005414.exon7:c.1985A>G.p.Q862R                                   | 30.77 | NM_005414    |
| ZNF385D  | P1 | 3  | 21465505  | 21465505  | Misense_Mutation  | SNP | G                             | G                             | T | ZNF385D.NM_024897.exon7:c.904-1C>A.p.P302T                              | 34.26 | NM_024897    |
| DOCK3    | P1 | 3  | 51411972  | 51411972  | Misense_Mutation  | SNP | G                             | G                             | A | DOCK3.NM_004947.exon50:c.536-6G>A.p.R178H                               | 28.13 | NM_004947    |
| CSN1P1   | P1 | 4  | 7087771   | 7087771   | Misense_Mutation  | SNP | C                             | C                             | A | CSN1P1.NM_018590.exon13:c.35-10C>T.p.A117V                              | 39.74 | NM_018590    |
| APC      | P1 | 5  | 112174885 | 112174886 | Frame_Shift_Ins   | DEL | AA                            | AA                            | - | APC.NM_000038.exon16:c.3596_3-58delA.p.K1199E                           | 25.52 | NM_000038    |
| SYNE1    | P1 | 6  | 152844715 | 152844715 | Misense_Mutation  | SNP | C                             | C                             | T | SYNE1.NM_182961.exon82:c.158-15G>A.p.R5272Q                             | 33.33 | NM_182961    |
| HSPA1L   | P1 | 6  | 31778156  | 31778156  | Misense_Mutation  | SNP | C                             | C                             | T | HSPA1L.NM_005527.exon2:c.169-4G>A.p.E532K                               | 11.56 | NM_005527    |
| KLF14    | P1 | 7  | 130418281 | 130418281 | Misense_Mutation  | SNP | G                             | G                             | A | KLF14.NM_138693.exon1:c.580C>T.p.R194C                                  | 20.19 | NM_138693    |
| BAG4     | P1 | 8  | 38066607  | 38066607  | Misense_Mutation  | SNP | G                             | G                             | A | BAG4.NM_004874.exon4:c.710G>A.p.R237Q                                   | 33.33 | NM_004874    |
| VCPIP1   | P1 | 8  | 67547410  | 67547410  | Misense_Mutation  | SNP | G                             | G                             | C | VCPIP1.NM_025054.exon3:c.2995-1C>G.p.P999A                              | 25.85 | NM_025054    |
| OTUD8B   | P1 | 8  | 92097062  | 92097062  | Misense_Mutation  | SNP | G                             | G                             | A | OTUD8B.NM_016023.exon7:c.938-1A>G.p.R130Q                               | 47.87 | NM_016023    |
| IFNA6    | P1 | 9  | 21350544  | 21350544  | Misense_Mutation  | SNP | G                             | G                             | T | IFNA6.NM_021002.exon1:c.343C>A.p.Q115K                                  | 30.77 | NM_021002    |
| C9orf64  | P1 | 9  | 86559744  | 86559744  | Misense_Mutation  | SNP | T                             | T                             | C | C9orf64.NM_002300.exon3:c.758A>G.p.K239R                                | 31.46 | NM_002300    |
| KRAS     | P2 | 12 | 25398284  | 25398284  | Misense_Mutation  | SNP | C                             | C                             | G | KRAS.NM_033360.exon2:c.35G>C.p.G12A                                     | 8.82  | NM_033360    |
| SLC2A14  | P2 | 12 | 7982501   | 7982501   | Misense_Mutation  | SNP | C                             | C                             | T | SLC2A14.NM_001086237.exon4:c.488G>A.p.R163H                             | 16.07 | NM_001086237 |
| CLSPN    | P2 | 1  | 36217056  | 36217056  | Misense_Mutation  | SNP | C                             | C                             | T | CLSPN.NM_022111.exon10:c.182-1G>G.p.R680Q                               | 19.54 | NM_022111    |
| SCEL     | P2 | 13 | 78133971  | 78133971  | Misense_Mutation  | SNP | G                             | G                             | A | SCEL.NM_144777.exon4:c.194G>A.p.R65Q                                    | 16.67 | NM_144777    |
| CHGB     | P2 | 20 | 5903841   | 5903841   | Misense_Mutation  | SNP | G                             | G                             | A | CHGB.NM_001819.exon4:c.1051G>A.p.V351I                                  | 15.79 | NM_001819    |
| KLHL6    | P2 | 3  | 183226065 | 183226065 | Misense_Mutation  | SNP | G                             | C                             | T | KLHL6.NM_130446.exon3:c.691G>A.p.E231K                                  | 13.82 | NM_130446    |
| APC      | P2 | 5  | 112175216 | 112175216 | Nonsense_Mutation | SNP | G                             | C                             | T | APC.NM_000038.exon16:c.3925G>T.p.E1309*                                 | 74.81 | NM_000038    |
| ADAMTS16 | P2 | 5  | 5262847   | 5262847   | Nonsense_Mutation | SNP | C                             | C                             | T | ADAMTS16.NM_139056.exon18:c.2740C>T.P.R914*                             | 31.17 | NM_139056    |
| ABCA13   | P2 | 7  | 48314760  | 48314760  | Misense_Mutation  | SNP | C                             | C                             | T | ABCA13.NM_152701.exon17:c.54-9T>C.p.R183W                               | 32.8  | NM_152701    |
| COL15A1  | P2 | 9  | 101802807 | 101802807 | Misense_Mutation  | SNP | C                             | C                             | T | COL15A1.NM_018555.exon23:c.2480C>T.P.R827L                              | 9.59  | NM_018555    |
| PAPPA    | P2 | 9  | 118950362 | 118950362 | Misense_Mutation  | SNP | G                             | G                             | A | PAPPA.NM_002581.exon2:c.1345-1C>A.p.V448H                               | 12.9  | NM_002581    |
| GPR50    | P2 | X  | 150349071 | 150349071 | Misense_Mutation  | SNP | G                             | G                             | A | GPR50.NM_004224.exon2:c.1016-1G>A.p.R339H                               | 10.69 | NM_004224    |
| FOXJ2    | P2 | 12 | 8200568   | 8200560   | In_Frame_Del      | DEL | CAG                           | CAG                           | - | FOXJ2.NM_018416.exon7:c.917_9-19delAGC.p.C2056del                       | 16.07 | NM_018416    |
| CHAT     | P2 | 10 | 50863221  | 50863221  | Misense_Mutation  | SNP | C                             | C                             | T | CHAT.NM_020548.exon12:c.1715-1C>T.p.S572L                               | 22.22 | NM_020548    |
| PLCE1    | P2 | 10 | 95995696  | 95995696  | Misense_Mutation  | SNP | G                             | G                             | T | PLCE1.NM_018341.exon7:c.2239-1G>T.p.D147Y                               | 11.49 | NM_016341    |
| ANOS     | P2 | 11 | 22239826  | 22239826  | Misense_Mutation  | SNP | G                             | G                             | A | ANOS.NM_021359.exon4:c.173G>A.p.R58Q                                    | 35.42 | NM_021359    |
| PSMD13   | P2 | 11 | 251569    | 251569    | Misense_Mutation  | SNP | G                             | G                             | C | PSMD13.NM_175932.exon8:c.857-1C>G.p.R269P                               | 10.47 | NM_175932    |
| OR4A16   | P2 | 11 | 5511584   | 5511584   | Misense_Mutation  | SNP | A                             | A                             | T | OR4A16.NM_001005274.exon1:c.908A>T.p.K303M                              | 55.88 | NM_001005274 |
| UBQLN3   | P2 | 11 | 5529465   | 5529465   | Misense_Mutation  | SNP | G                             | G                             | T | UBQLN3.NM_017481.exon2:c.132-1G>A.p.P422T                               | 15.25 | NM_017481    |
| SPTA1    | P2 | 1  | 158584091 | 158584091 | Misense_Mutation  | SNP | A                             | A                             | G | SPTA1.NM_003126.exon49:c.6794-1T>C.p.L285T                              | 36.84 | NM_003126    |
| PRG4     | P2 | 1  | 186273994 | 186273994 | Misense_Mutation  | SNP | C                             | C                             | A | PRG4.NM_005807.exon6:c.538C>T.p.R191W                                   | 57.14 | NM_005807    |
| TMCC2    | P2 | 1  | 205241235 | 205241235 | Misense_Mutation  | SNP | G                             | G                             | A | TMCC2.NM_014858.exon5:c.2113-1G>A.p.V705M                               | 12.61 | NM_014858    |
| PK3C2G   | P2 | 12 | 18435399  | 18435401  | In_Frame_Del      | DEL | CCC                           | CCC                           | - | PK3C2G.NM_00128772.exon2:c.385_387delCCC.p.P129del                      | 35.94 | NM_00128772  |
| PK3C2G   | P2 | 12 | 18435452  | 18435452  | Misense_Mutation  | SNP | C                             | C                             | T | PK3C2G.NM_00128772.exon2:c.437C>T.p.P146L                               | 38.6  | NM_00128772  |
| MRPS35   | P2 | 12 | 27867727  | 27867727  | Misense_Mutation  | SNP | G                             | G                             | A | MRPS35.NM_021621.exon2:c.127-1G>A.p.G43R                                | 36.07 | NM_021621    |
| MBD6     | P2 | 12 | 57918525  | 57918525  | Misense_Mutation  | SNP | T                             | T                             | C | MBD6.NM_052897.exon4:c.136T>C.p.S46P                                    | 29.31 | NM_052897    |
| PTPN6    | P2 | 12 | 7064899   | 7064899   | Misense_Mutation  | SNP | G                             | G                             | T | PTPN6.NM_005458.exon7:c.824G>T.p.R275L                                  | 22.92 | NM_005458    |
| WNK1     | P2 | 12 | 970483    | 970483    | Misense_Mutation  | SNP | A                             | A                             | G | WNK1.NM_021365.exon7:c.1925A>G.p.Y642C                                  | 12.07 | NM_021365    |
| CCDC168  | P2 | 13 | 103397057 | 103397057 | Nonsense_Mutation | SNP | G                             | G                             | T | CCDC168.NM_001148197.exon4:c.5990C>A.p.S199Y*                           | 12.23 | NM_001148197 |
| SETDB2   | P2 | 13 | 50057097  | 50057097  | Misense_Mutation  | SNP | G                             | G                             | A | SETDB2.NM_031915.exon10:c.14-1T>G.p.V473M                               | 56.82 | NM_031915    |
| TP73     | P2 | 1  | 3647535   | 3647535   | Misense_Mutation  | SNP | G                             | G                             | A | TP73.NM_005427.exon12:c.1390C>A.p.G445S                                 | 16.79 | NM_005427    |
| OXGR1    | P2 | 13 | 97638622  | 97638622  | Misense_Mutation  | SNP | C                             | C                             | C | OXGR1.NM_006081.exon4:c.392G>A.p.R101H                                  | 29.55 | NM_006081    |
| PLD4     | P2 | 14 | 105398401 | 105398401 | Misense_Mutation  | SNP | G                             | G                             | A | PLD4.NM_001308174.exon9:c.113-2G>A.p.V378M                              | 15.79 | NM_001308174 |
| CHGA     | P2 | 14 | 93399045  | 93399045  | Misense_Mutation  | SNP | C                             | C                             | G | CHGA.NM_001276.exon7:c.1139C>G.p.A308Q                                  | 23.87 | NM_001276    |
| SCNN1B   | P2 | 16 | 23391982  | 23391982  | Misense_Mutation  | SNP | G                             | G                             | C | SCNN1B.NM_000336.exon13:c.17-83G>C.p.A566P                              | 10.13 | NM_000336    |
| MYO15A   | P2 | 17 | 18024806  | 18024806  | Misense_Mutation  | SNP | G                             | G                             | A | MYO15A.NM_016239.exon2:c.269-1C>G.p.G989R                               | 13.51 | NM_016239    |
| UTP6     | P2 | 17 | 30222002  | 30222002  | Misense_Mutation  | SNP | T                             | T                             | C | UTP6.NM_018428.exon3:c.206A>G.p.Q69R                                    | 65    | NM_018428    |
| ARRB2    | P2 | 17 | 4619845   | 4619845   | Misense_Mutation  | SNP | G                             | G                             | A | ARRB2.NM_001257328.exon5:c.2-9G>A.p.R1109H                              | 12.23 | NM_001257328 |
| AXIN2    | P2 | 17 | 63554666  | 63554666  | Misense_Mutation  | SNP | G                             | G                             | A | AXIN2.NM_004955.exon2:c.73C>T.p.P25S                                    | 28.43 | NM_004955    |
| ZNF521   | P2 | 18 | 22860051  | 22860051  | Misense_Mutation  | SNP | C                             | C                             | A | ZNF521.NM_015461.exon4:c.1831-1G>T.p.A811S                              | 20.31 | NM_015461    |
| CBLN2    | P2 | 18 | 70209101  | 70209101  | Misense_Mutation  | SNP | G                             | G                             | A | CBLN2.NM_182511.exon3:c.296C>T.p.R399W                                  | 14.42 | NM_182511    |
| OR11H    | P2 | 19 | 15198488  | 15198488  | Misense_Mutation  | SNP | T                             | T                             | G | OR11H.NM_001004713.exon1:c.61-4T>C.p.Q24H                               | 13.33 | NM_001004713 |
| SCAF1    | P2 | 19 | 50155362  | 50155367  | In_Frame_Del      | DEL | CCGCTC                        | CCGCTC                        | - | SCAF1.NM_021228.exon7:c.1741-1748delCGCTC.p.R581_S582del                | 41.18 | NM_021228    |
| NLRP2    | P2 | 19 | 55494753  | 55494753  | Misense_Mutation  | SNP | G                             | G                             | A | NLRP2.NM_017852.exon6:c.1687-1G>A.p.E563K                               | 12.5  | NM_017852    |
| ZSCAN5B  | P2 | 19 | 56703269  | 56703269  | Misense_Mutation  | SNP | G                             | G                             | A | ZSCAN5B.NM_001080456.exon2:c.538C>T.p.R180C                             | 25.51 | NM_001080456 |
| PEG3     | P2 | 19 | 57326319  | 57326319  | Misense_Mutation  | SNP | T                             | T                             | C | PEG3.NM_006210.exon10:c.3491-1A>G.p.E1164G                              | 16.67 | NM_006210    |
| ROCK2    | P2 | 2  | 11359120  | 11359120  | Misense_Mutation  | SNP | G                             | G                             | T | ROCK2.NM_004850.exon10:c.129-2C>A.p.T431N                               | 50    | NM_004850    |
| RBM11    | P2 | 21 | 15596772  | 15596772  | Misense_Mutation  | SNP | T                             | T                             | G | RBM11.NM_00132602.exon4:c.3-46T>G.p.L116V                               | 47.37 | NM_00132602  |
| NMI      | P2 | 2  | 152139416 | 152139416 | Misense_Mutation  | SNP | G                             | G                             | A | NMI.NM_004688.exon2:c.47C>T.p.S16L                                      | 33.33 | NM_004688    |
| GRB14    | P2 | 2  | 165365287 | 165365288 | Frame_Shift_Ins   | INS | -                             | -                             | T | GRB14.NM_004450.exon7:c.891d-1up.p.H298fs                               | 11.94 | NM_004490    |
| TMP4     | P2 | 3  | 12198364  | 12198364  | Misense_Mutation  | SNP | C                             | C                             | T | TMP4.NM_003256.exon3:c.308G>A.p.G103D                                   | 25.93 | NM_003256    |
| ATR      | P2 | 3  | 142274739 | 142274740 | Frame_Shift_Ins   | INS | -                             | -                             | T | ATR.NM_001184.exon10:c.2320                                             |       |              |

|          |    |    |           |           |                   |         |       |       |        |                                                      |       |              |
|----------|----|----|-----------|-----------|-------------------|---------|-------|-------|--------|------------------------------------------------------|-------|--------------|
| CCDC110  | P2 | 4  | 186380243 | 186380243 | Misense_Mutation  | SNP     | A     | A     | C      | CCDC110.NM_152775.exon6:c.1488T>G                    | 63.33 | NM_152775    |
| KLKB1    | P2 | 4  | 187178473 | 187178473 | Misense_Mutation  | SNP     | G     | G     | A      | KLKB1.NM_008952.exon14:c.1679G>A                     | 37.93 | NM_008952    |
| SORCS2   | P2 | 4  | 7728561   | 7728561   | Misense_Mutation  | SNP     | G     | G     | A      | SORCS2.NM_020777.exon21:c.2800G>A                    | 15.15 | NM_020777    |
| FRAS1    | P2 | 4  | 79367890  | 79367890  | Misense_Mutation  | SNP     | G     | G     | A      | FRAS1.NM_025071.exon4:c.5866G>A                      | 19.74 | NM_025071    |
| SPINK5   | P2 | 5  | 147496045 | 147496045 | Misense_Mutation  | SNP     | G     | G     | A      | SPINK5.NM_008816.exon25:c.2387G>A                    | 32.47 | NM_008816    |
| ADAMTS6  | P2 | 5  | 64756126  | 64756126  | Misense_Mutation  | SNP     | C     | C     | T      | ADAMTS6.NM_197941.exon4:c.502G>A                     | 15.87 | NM_197941    |
| POCS     | P2 | 5  | 75001582  | 75001582  | Misense_Mutation  | SNP     | A     | A     | G      | POCS.NM_001099271.exon4:c.2547C>G                    | 60.87 | NM_001099271 |
| IQGAP2   | P2 | 5  | 75927738  | 75927738  | Misense_Mutation  | SNP     | A     | A     | T      | IQGAP2.NM_006633.exon15:c.1667A>T                    | 16.52 | NM_006633    |
| ZBTB2    | P2 | 6  | 151687638 | 151687638 | Misense_Mutation  | SNP     | G     | G     | A      | ZBTB2.NM_020861.exon3:c.565C>T                       | 19.63 | NM_020861    |
| RSPH3    | P2 | 6  | 159399348 | 159399348 | Misense_Mutation  | SNP     | A     | A     | G      | RSPH3.NM_031924.exon7:c.1316T>C                      | 36.84 | NM_031924    |
| IMP1     | P2 | 6  | 76631823  | 76631823  | Misense_Mutation  | SNP     | C     | C     | T      | IMP1.NM_001563.exon17:c.2377G>C                      | 41.67 | NM_001563    |
| CTTNBP2  | P2 | 7  | 117450845 | 117450845 | Misense_Mutation  | SNP     | C     | C     | T      | CTTNBP2.NM_033427.exon3:c.388G>A                     | 43.59 | NM_033427    |
| WEE2     | P2 | 7  | 141429437 | 141429437 | Misense_Mutation  | SNP     | G     | G     | A      | WEE2.NM_00105508.exon11:c.1640G>C                    | 10.26 | NM_00105508  |
| PKD1L1   | P2 | 7  | 47917119  | 47917119  | Misense_Mutation  | SNP     | C     | C     | T      | PKD1L1.NM_138295.exon22:c.3631G>A                    | 13.1  | NM_138295    |
| GUSB     | P2 | 7  | 65441045  | 65441045  | Misense_Mutation  | SNP     | G     | G     | A      | GUSB.NM_000181.exon5:c.869C>T                        | 10.34 | NM_000181    |
| PUF60    | P2 | 8  | 144899294 | 144899294 | Misense_Mutation  | SNP     | G     | G     | C      | PUF60.NM_078480.exon11:c.1166C>G                     | 27.84 | NM_078480    |
| FOCAD    | P2 | 9  | 20819889  | 20819889  | Misense_Mutation  | SNP     | G     | G     | T      | FOCAD.NM_017794.exon14:c.1555G>T                     | 42.86 | NM_017794    |
| RORB     | P2 | 9  | 77257699  | 77257699  | Misense_Mutation  | SNP     | A     | A     | G      | RORB.NM_006914.exon4:c.605A>G                        | 30.34 | NM_006914    |
| FOXR2    | P2 | X  | 55650629  | 55650629  | Misense_Mutation  | SNP     | C     | C     | A      | FOXR2.NM_189451.exon11:c.488C>A                      | 18.87 | NM_189451    |
| ELMOD1   | P3 | 11 | 107502336 | 107502336 | Misense_Mutation  | SNP     | G     | G     | A      | ELMOD1.NM_018712.exon5:c.223G>A                      | 10.67 | NM_018712    |
| WSCD2    | P3 | 12 | 108603974 | 108603974 | Misense_Mutation  | SNP     | G     | G     | A      | WSCD2.NM_014652.exon4:c.574G>A                       | 5.45  | NM_014652    |
| OBSN     | P3 | 1  | 228444454 | 228444454 | Misense_Mutation  | SNP     | C     | C     | T      | OBSN.NM_001271223.exon16:c.4688C>T                   | 32.56 | NM_001271223 |
| SV2B     | P3 | 15 | 91769716  | 91769716  | Misense_Mutation  | SNP     | C     | C     | T      | SV2B.NM_014848.exon3:c.223C>T                        | 5.69  | NM_014848    |
| C16orf78 | P3 | 16 | 49430376  | 49430376  | Misense_Mutation  | SNP     | G     | G     | A      | C16orf78.NM_144602.exon4:c.437G>A                    | 14    | NM_144602    |
| EDC4     | P3 | 16 | 67912294  | 67912294  | Misense_Mutation  | SNP     | C     | C     | T      | EDC4.NM_014329.exon5:c.1036C>T                       | 15.12 | NM_014329    |
| PSGN     | P3 | 19 | 43762546  | 43762546  | Misense_Mutation  | SNP     | C     | C     | T      | PSGN.NM_002784.exon5:c.1051G>A                       | 13.69 | NM_002784    |
| NR1H2    | P3 | 19 | 50882412  | 50882412  | Misense_Mutation  | SNP     | G     | G     | A      | NR1H2.NM_007121.exon7:c.901G>A                       | 12.9  | NM_007121    |
| SMARCB1  | P3 | 22 | 24133967  | 24133967  | Nonsense_Mutation | SNP     | C     | C     | T      | SMARCB1.NM_003073.exon2:c.118C>T                     | 13.33 | NM_003073    |
| SULT1B1  | P3 | 2  | 37406711  | 37406711  | Misense_Mutation  | SNP     | C     | C     | T      | SULT1B1.NM_001032377.exon4:c.305G>A                  | 12.24 | NM_001032377 |
| APC      | P3 | 5  | 112173917 | 112173917 | Nonsense_Mutation | SNP     | C     | C     | T      | APC.NM_000038.exon16:c.2626C>T                       | 26.52 | NM_000038    |
| APC      | P3 | 5  | 112173618 | 112173618 | Frame_Shift_ins   | DEL     | C     | C     | -      | APC.NM_000038.exon16:c.4328deletion                  | 39.16 | NM_000038    |
| PITRM1   | P3 | 10 | 3208567   | 3208567   | Frame_Shift_ins   | INS     | -     | -     | -      | PITRM1.NM_001242307.exon4:c.271_272insCATTCTCTCTCTCC | 41.05 | NM_001242307 |
| LDB3     | P3 | 10 | 88451678  | 88451678  | Misense_Mutation  | SNP     | G     | G     | A      | LDB3.NM_007078.exon5:c.715G>A                        | 13.98 | NM_007078    |
| PKLR     | P3 | 1  | 15269931  | 15269931  | Misense_Mutation  | SNP     | C     | C     | T      | PKLR.NM_000298.exon2:c.241G>A                        | 11.11 | NM_000298    |
| TSKU     | P3 | 11 | 76507688  | 76507688  | Misense_Mutation  | SNP     | G     | G     | A      | TSKU.NM_001318477.exon2:c.107G>A                     | 18.46 | NM_001318477 |
| TENM4    | P3 | 11 | 78498012  | 78498012  | Misense_Mutation  | SNP     | C     | C     | T      | TENM4.NM_001098818.exon1:c.2296G>A                   | 25.53 | NM_001098818 |
| TENM4    | P3 | 11 | 78565286  | 78565286  | Misense_Mutation  | SNP     | C     | C     | T      | TENM4.NM_001098818.exon1:c.1544G>A                   | 15.38 | NM_001098818 |
| LAMC1    | P3 | 1  | 183105592 | 183105592 | Nonsense_Mutation | SNP     | C     | C     | T      | LAMC1.NM_002253.exon5:c.4186C>T                      | 19.35 | NM_002253    |
| IKBKE    | P3 | 1  | 206669465 | 206669465 | Misense_Mutation  | SNP     | C     | C     | T      | IKBKE.NM_014002.exon2:c.2138C>T                      | 45.83 | NM_014002    |
| KNTC1    | P3 | 12 | 12305743  | 12305743  | Misense_Mutation  | SNP     | C     | C     | T      | KNTC1.NM_014708.exon26:c.2194C>T                     | 21.17 | NM_014708    |
| SOX1     | P3 | 13 | 112723111 | 112723111 | In_Frame_ins      | INS     | -     | -     | GGGGGT | SOX1.NM_005986.exon1:c.1141_1146insGGGGGT            | 42.42 | NM_005986    |
| LRP8     | P3 | 1  | 53746310  | 53746310  | Misense_Mutation  | SNP     | C     | C     | T      | LRP8.NM_004631.exon4:c.445G>A                        | 13.91 | NM_004631    |
| C15orf39 | P3 | 15 | 75499490  | 75499490  | Misense_Mutation  | SNP     | C     | C     | G      | C15orf39.NM_015492.exon2:c.110C>G                    | 26.57 | NM_015492    |
| ISL2     | P3 | 15 | 76534135  | 76534135  | Misense_Mutation  | SNP     | G     | G     | T      | ISL2.NM_145805.exon8:c.1039G>T                       | 13.64 | NM_145805    |
| TACSTD2  | P3 | 1  | 59042494  | 59042494  | Misense_Mutation  | SNP     | C     | C     | T      | TACSTD2.NM_002353.exon1:c.338G>A                     | 13.25 | NM_002353    |
| SSTR5    | P3 | 16 | 1129733   | 1129733   | Misense_Mutation  | SNP     | G     | G     | A      | SSTR5.NM_001053.exon1:c.865G>A                       | 11.28 | NM_001053    |
| TXNDC11  | P3 | 16 | 11836508  | 11836508  | Misense_Mutation  | SNP     | G     | G     | A      | TXNDC11.NM_001303447.exon1:c.780T>P                  | 46.67 | NM_001303447 |
| DNAH3    | P3 | 16 | 20990740  | 20990740  | Misense_Mutation  | SNP     | G     | G     | A      | DNAH3.NM_017539.exon50:c.7988C>T                     | 38.24 | NM_017539    |
| BICDL2   | P3 | 16 | 3079685   | 3079685   | Misense_Mutation  | SNP     | T     | T     | C      | BICDL2.NM_001103175.exon5:c.818A>G                   | 60    | NM_001103175 |
| RFX1     | P3 | 16 | 7703915   | 7703915   | Misense_Mutation  | SNP     | G     | G     | A      | RFX1.NM_001308117.exon12:c.985G>A                    | 22.22 | NM_001308117 |
| HASPN    | P3 | 17 | 3628656   | 3628656   | Misense_Mutation  | SNP     | G     | G     | A      | HASPN.NM_001965.exon1:c.1427G>A                      | 13.74 | NM_001965    |
| TBX21    | P3 | 17 | 45822289  | 45822289  | Misense_Mutation  | SNP     | G     | G     | C      | TBX21.NM_013351.exon6:c.1165G>C                      | 11.76 | NM_013351    |
| UTP18    | P3 | 17 | 49357831  | 49357831  | Misense_Mutation  | SNP     | G     | G     | A      | UTP18.NM_016001.exon9:c.1195G>A                      | 17.54 | NM_016001    |
| COG1     | P3 | 17 | 7197890   | 7197890   | Misense_Mutation  | SNP     | C     | C     | A      | COG1.NM_018714.exon7:c.1924C>A                       | 41.35 | NM_018714    |
| KCNQ2    | P3 | 18 | 77623854  | 77623854  | Misense_Mutation  | SNP     | G     | G     | A      | KCNQ2.NM_012283.exon1:c.187G>A                       | 14.85 | NM_012283    |
| PAK4     | P3 | 19 | 3963643   | 3963643   | Misense_Mutation  | SNP     | C     | C     | A      | PAK4.NM_005884.exon4:c.290C>G                        | 23.88 | NM_005884    |
| LRFN1    | P3 | 19 | 3980533   | 3980533   | Misense_Mutation  | SNP     | A     | A     | T      | LRFN1.NM_009692.exon1:c.844T>A                       | 21.43 | NM_009692    |
| SPTBN4   | P3 | 19 | 41018705  | 41018705  | Misense_Mutation  | SNP     | C     | C     | T      | SPTBN4.NM_020971.exon14:c.2095C>T                    | 42.22 | NM_020971    |
| MADCAM1  | P3 | 19 | 501701    | 501701    | Misense_Mutation  | SNP     | G     | G     | A      | MADCAM1.NM_150760.exon4:c.700G>A                     | 48.65 | NM_150760    |
| MADCAM1  | P3 | 19 | 501719    | 501719    | Misense_Mutation  | SNP     | T     | T     | C      | MADCAM1.NM_150760.exon4:c.718T>C                     | 67.5  | NM_150760    |
| R3HDM4   | P3 | 19 | 899617    | 899617    | Misense_Mutation  | SNP     | C     | C     | T      | R3HDM4.NM_138774.exon6:c.631G>A                      | 12.68 | NM_138774    |
| SAP130   | P3 | 2  | 12873988  | 12873988  | Misense_Mutation  | SNP     | G     | G     | A      | SAP130.NM_001145928.exon4:c.560C>T                   | 31.09 | NM_001145928 |
| URB1     | P3 | 21 | 33694176  | 33694176  | Misense_Mutation  | SNP     | G     | G     | A      | URB1.NM_014825.exon34:c.5419C>T                      | 30.85 | NM_014825    |
| NEB      | P3 | 2  | 152420351 | 152420351 | Misense_Mutation  | SNP     | G     | G     | T      | NEB.NM_001271208.exon18:c.1856C>A                    | 18.75 | NM_001271208 |
| SCARF2   | P3 | 22 | 20780026  | 20780026  | Misense_Mutation  | COMPLEX | GCGG  | GCGG  | GCGGGC | SCARF2.NM_153334.exon12:c.2247_2250delGCGCGCGG       | 11.54 | NM_153334    |
| P2RX6    | P3 | 22 | 21377288  | 21377288  | Nonsense_Mutation | SNP     | G     | G     | A      | P2RX6.NM_005446.exon5:c.521G>A                       | 32.61 | NM_005446    |
| ZFP36L2  | P3 | 2  | 43451955  | 43451955  | Frame_Shift_ins   | COMPLEX | CAGCC | CAGCC | GCT    | ZFP36L2.NM_006887.exon2:c.984_986delGGCGTGGAGC       | 26.32 | NM_006887    |
| TMEM247  | P3 | 2  | 46707851  | 46707851  | Misense_Mutation  | SNP     | G     | G     | A      | TMEM247.NM_00146691.exon2:c.425G>A                   | 59.84 | NM_00146691  |
| CCDC80   | P3 | 3  | 112358175 | 112358175 | Misense_Mutation  | SNP     | G     | G     | A      | CCDC80.NM_199511.exon2:c.578C>T                      | 39.55 | NM_199511    |
| WNT5A    | P3 | 3  | 55504410  | 55504410  | Misense_Mutation  | SNP     | C     | C     | T      | WNT5A.NM_003392.exon5:c.853G>A                       | 37.97 | NM_003392    |
| BHMT2    | P3 | 5  | 78384318  | 78384318  | Misense_Mutation  | SNP     | C     | C     | A      | BHMT2.NM_0017614.exon8:c.1013C>G                     | 13.33 | NM_0017614   |
| IP6K3    | P3 | 6  | 33695880  | 33695880  | Misense_Mutation  | SNP     | G     | G     | A      | IP6K3.NM_054111.exon3:c.397C>T                       | 15.56 | NM_054111    |
| UHRF1BP1 | P3 | 6  | 34826040  | 34826040  | Misense_Mutation  | SNP     | G     | G     | A      | UHRF1BP1.NM_017754.exon14:c.1907G>A                  | 14.29 | NM_017754    |
| RCAN2    | P3 | 6  | 46190991  | 46190991  | Misense_Mutation  | SNP     | C     | C     | T      | RCAN2.NM_001251973.exon5:c.619G>A                    | 22.79 | NM_001251973 |
| WDR86    | P3 | 7  | 151082198 | 151082198 | Misense_Mutation  | SNP     | C     | C     | T      | WDR86.NM_001294260.exon4:c.9G>A                      | 32.39 | NM_001294260 |
| ABCA13   | P3 | 7  | 48273718  | 48273718  | Misense_Mutation  | SNP     | G     | G     | C      | ABCA13.NM_152701.exon8:c.867G>T                      | 12.5  | NM_152701    |
| GSDMD    | P3 | 8  | 144841557 | 144841557 | Misense_Mutation  | SNP     | C     | C     | G      | GSDMD.NM_024738.exon2:c.52C>G                        | 13.79 | NM_024738    |
| SCRIB    | P3 | 8  | 144887461 | 144887461 | Misense_Mutation  | SNP     | C     | C     | T      | SCRIB.NM_182706.exon19:c.2491G>A                     | 11.46 | NM_182706    |
| CSMD1    | P3 | 8  | 2857534   | 2857534   | Misense_Mutation  | SNP     | C     | C     | A      | CSMD1.NM_033225.exon3:c.814G>A                       | 15.85 | NM_033225    |
| STAB2    | P4 | 12 | 104105290 | 104105290 | Misense_Mutation  | SNP     | C     | C     | T      | STAB2.NM_017564.exon40:c.4330G>A                     | 35.09 | NM_017564    |
| GJA4     | P4 | 1  | 35260514  | 35260514  | Misense_Mutation  | SNP     | C     | C     | T      | GJA4.NM_002060.exon2:c.700C>T                        | 17.95 | NM_002060    |

|          |    |    |           |           |                   |         |                                   |                                   |               |                                                                                    |       |              |
|----------|----|----|-----------|-----------|-------------------|---------|-----------------------------------|-----------------------------------|---------------|------------------------------------------------------------------------------------|-------|--------------|
| SLC6A11  | P4 | 3  | 10885924  | 10885924  | Misense_Mutation  | SNP     | G                                 | G                                 | A             | SLC6A11:NM_014229:exon5:c.649 G>A p.G217R                                          | 22.33 | NM_014229    |
| FBXW7    | P4 | 4  | 153245447 | 153245447 | Misense_Mutation  | SNP     | A                                 | A                                 | G             | FBXW7:NM_033632:exon11:c.174 4T>C p.S582P                                          | 6     | NM_033632    |
| APC      | P4 | 5  | 112173917 | 112173917 | Nonsense_Mutation | SNP     | C                                 | C                                 | T             | APC:NM_000038:exon16:c.2626C >T p.R876*                                            | 28.85 | NM_000038    |
| APC      | P4 | 5  | 112175639 | 112175639 | Nonsense_Mutation | SNP     | C                                 | C                                 | T             | APC:NM_000038:exon16:c.4348C >T p.R1450*                                           | 28.41 | NM_000038    |
| CRTAC1   | P4 | 10 | 99696056  | 99696056  | Misense_Mutation  | SNP     | C                                 | C                                 | T             | CRTAC1:NM_018058:exon3:c.292 C>A p.D36N                                            | 17.02 | NM_018058    |
| CNTN5    | P4 | 11 | 100061886 | 100061886 | Misense_Mutation  | SNP     | C                                 | C                                 | T             | CNTN5:NM_014361:exon14:c.160 9C>T p.R537W                                          | 30.09 | NM_014361    |
| KDEL2    | P4 | 11 | 108350085 | 108350085 | Misense_Mutation  | SNP     | A                                 | A                                 | C             | KDEL2:NM_153705:exon6:c.123 4T>G p.H412D                                           | 19.3  | NM_153705    |
| ARHGEP12 | P4 | 11 | 120351125 | 120351125 | Misense_Mutation  | SNP     | A                                 | A                                 | G             | ARHGEP12:NM_015313:exon38:c.4223A>G p.N1408S                                       | 40.71 | NM_015313    |
| IVL      | P4 | 1  | 152883680 | 152883680 | Misense_Mutation  | SNP     | A                                 | A                                 | T             | IVL:NM_005547:exon2:c.1407A>T p.Q249H                                              | 33.59 | NM_005547    |
| ORS1B2   | P4 | 11 | 5345158   | 5345158   | Misense_Mutation  | SNP     | T                                 | T                                 | C             | ORS1B2:NM_033180:exon1:c.370 A>G p.H124V                                           | 32.24 | NM_033180    |
| NES      | P4 | 1  | 156642748 | 156642748 | In_Frame_Del      | DEL     | GAG                               | GAG                               | -             | NES:NM_006917:exon4:c.1232_1234delCTC p.P411del                                    | 28.21 | NM_006917    |
| NME7     | P4 | 1  | 169239892 | 169239892 | Misense_Mutation  | SNP     | T                                 | T                                 | C             | NME7:NM_013330:exon2:c.50A>G p.N17S                                                | 29.46 | NM_013330    |
| PITPNM2  | P4 | 12 | 123485684 | 123485684 | Misense_Mutation  | SNP     | C                                 | C                                 | G             | PITPNM2:NM_020845:exon8:c.106 G>C p.D354H                                          | 27.94 | NM_020845    |
| SMYD2    | P4 | 1  | 214504326 | 214504326 | Misense_Mutation  | SNP     | G                                 | G                                 | A             | SMYD2:NM_020197:exon9:c.850G >A p.D284N                                            | 35    | NM_020197    |
| CAPZA3   | P4 | 12 | 18891215  | 18891215  | Misense_Mutation  | SNP     | G                                 | G                                 | A             | CAPZA3:NM_033329:exon1:c.13G >A p.V38M                                             | 39.08 | NM_033328    |
| CACNA2D4 | P4 | 12 | 1993428   | 1993428   | Nonsense_Mutation | SNP     | C                                 | C                                 | T             | CACNA2D4:NM_172364:exon12:c.133G>A p.W444*                                         | 32.94 | NM_172364    |
| HLX      | P4 | 1  | 221053600 | 221053600 | Misense_Mutation  | SNP     | A                                 | A                                 | C             | HLX:NM_021958:exon1:c.401A>C p.Q149P                                               | 28.04 | NM_021958    |
| EPB42    | P4 | 15 | 43512988  | 43512988  | Misense_Mutation  | SNP     | C                                 | C                                 | T             | EPB42:NM_000119:exon1:c.26G>A p.R9H                                                | 35.85 | NM_000119    |
| CLUH     | P4 | 17 | 2958597   | 2958597   | Misense_Mutation  | SNP     | C                                 | C                                 | T             | CLUH:NM_015229:exon2:c.3289 34delCTC p.P411del                                     | 34.04 | NM_015229    |
| SARM1    | P4 | 17 | 26699196  | 26699196  | Frame_Shift_Ins   | COMPLEX | CGGGCCCGCGG A                     | CGGGCCCGCGG A                     | CGGGCCCGCGG A | 150delCGGGCCCGCGGinsCGGGCCCGCGG p.P485                                             | 15.38 | NM_015077    |
| TMEM99   | P4 | 17 | 38991247  | 38991247  | Misense_Mutation  | SNP     | A                                 | A                                 | C             | TMEM99:NM_145274:exon3:c.479 A>C p.H160P                                           | 26.25 | NM_145274    |
| DNAH17   | P4 | 17 | 76451776  | 76451776  | Misense_Mutation  | SNP     | G                                 | G                                 | A             | DNAH17:NM_173628:exon63:c.10 12C>T p.R3374W                                        | 24.42 | NM_173628    |
| ZNF878   | P4 | 19 | 12154799  | 12154799  | Misense_Mutation  | SNP     | G                                 | G                                 | C             | ZNF878:NM_001080404:exon4:c.1 417C>G p.H473D                                       | 45.45 | NM_001080404 |
| FCHO1    | P4 | 19 | 17875219  | 17875219  | Misense_Mutation  | SNP     | C                                 | C                                 | T             | FCHO1:NM_001161351:exon6:c.1 55C>T p.A52V                                          | 26.44 | NM_001161351 |
| GMP      | P4 | 19 | 19747825  | 19747825  | Misense_Mutation  | SNP     | T                                 | T                                 | C             | GMP:NM_016573:exon12:c.1138A >G p.P380V                                            | 45.28 | NM_016573    |
| TJP3     | P4 | 19 | 3746010   | 3746010   | Misense_Mutation  | SNP     | G                                 | G                                 | T             | TJP3:NM_001267561:exon16:c.19 68G>T p.E596D                                        | 28.57 | NM_001267561 |
| ZNF446   | P4 | 19 | 58991828  | 58991828  | Misense_Mutation  | SNP     | C                                 | C                                 | T             | ZNF446:NM_017908:exon7:c.1088 C>T p.P363L                                          | 41.98 | NM_017908    |
| TGM6     | P4 | 20 | 2384368   | 2384368   | Misense_Mutation  | SNP     | G                                 | G                                 | A             | TGM6:NM_188994:exon8:c.1235G >A p.R412H                                            | 29.63 | NM_188994    |
| FAM83D   | P4 | 20 | 37555158  | 37555158  | Misense_Mutation  | SNP     | A                                 | A                                 | G             | FAM83D:NM_030919:exon1:c.73A >G p.T25A                                             | 32.5  | NM_030919    |
| RIPOR3   | P4 | 20 | 49219025  | 49219025  | Misense_Mutation  | SNP     | G                                 | G                                 | A             | RIPOR3:NM_001290268:exon13:c.1243C>T p.P415S                                       | 30.38 | NM_001290268 |
| FAM171B  | P4 | 2  | 187559029 | 187559030 | In_Frame_Ins      | INS     | -                                 | -                                 | CAG           | FAM171B:NM_177454:exon1:c.14 7_149dupGCA p.Q50dup                                  | 17.65 | NM_177454    |
| HIC2     | P4 | 22 | 21800776  | 21800776  | Misense_Mutation  | SNP     | G                                 | G                                 | A             | HIC2:NM_015094:exon3:c.1592G>A p.R510Q                                             | 24.81 | NM_015094    |
| GIGYF2   | P4 | 2  | 233660881 | 233660881 | Misense_Mutation  | SNP     | A                                 | A                                 | G             | GIGYF2:NM_001103147:exon16:c.1652A>G p.H551R                                       | 32.14 | NM_001103147 |
| DRC1     | P4 | 2  | 26676222  | 26676222  | Misense_Mutation  | SNP     | C                                 | C                                 | T             | DRC1:NM_145038:exon14:c.1724 C>T p.A575V                                           | 37.5  | NM_145038    |
| SLC25A36 | P4 | 3  | 140678306 | 140678306 | Misense_Mutation  | SNP     | G                                 | G                                 | T             | SLC25A36:NM_001104647:exon3:c.208G>T p.V70L                                        | 33.33 | NM_001104647 |
| NLGN1    | P4 | 3  | 173998554 | 173998554 | Misense_Mutation  | SNP     | C                                 | C                                 | T             | NLGN1:NM_014932:exon7:c.1933 C>T p.P645S                                           | 35.67 | NM_014932    |
| ARAP3    | P4 | 5  | 141052442 | 141052442 | Misense_Mutation  | SNP     | G                                 | G                                 | A             | ARAP3:NM_022481:exon8:c.1144 C>T p.R380C                                           | 31.25 | NM_022481    |
| IRF5     | P4 | 7  | 128587344 | 128587373 | In_Frame_Del      | DEL     | GGCCGCCCACT CTGCAGCCGCGC CACTCTGC | GGCCGCCCACT CTGCAGCCGCGC CACTCTGC | -             | IRF5:NM_001098629:exon5:c.549 578delCACTCTGCAGCCGCCCACTCTGCAGCCGCGC p.T184_P193del | 28.95 | NM_001098629 |
| ETV1     | P4 | 7  | 13940436  | 13940436  | Misense_Mutation  | SNP     | T                                 | T                                 | C             | ETV1:NM_004956:exon13:c.1139A >G p.N380S                                           | 35.04 | NM_004956    |
| KEL      | P4 | 7  | 142658528 | 142658528 | Misense_Mutation  | SNP     | C                                 | C                                 | T             | KEL:NM_000420:exon3:c.142G>A p.V48M                                                | 25.58 | NM_000420    |
| PCLO     | P4 | 7  | 82784832  | 82784832  | Misense_Mutation  | SNP     | C                                 | C                                 | G             | PCLO:NM_030326:exon2:c.1125G >C p.Q375H                                            | 53.62 | NM_030326    |
| ODF1     | P4 | 8  | 103573006 | 103573006 | Misense_Mutation  | SNP     | G                                 | G                                 | A             | ODF1:NM_024410:exon2:c.647G>A p.S216N                                              | 52.42 | NM_024410    |
| C3orf84  | P4 | 9  | 114500617 | 114500617 | Misense_Mutation  | SNP     | A                                 | A                                 | G             | C3orf84:NM_173521:exon10:c.116 8T>C p.S390P                                        | 40    | NM_173521    |
| GBA2     | P4 | 9  | 35738334  | 35738346  | Frame_Shift_Ins   | DEL     | CAGCCACAGT GC                     | CAGCCACAGCTGC                     | -             | GBA2:NM_020944:exon14:c.2080_2092delGAGCAGCTGTGCTG p.A69                           | 19.53 | NM_020944    |
| IGSF1    | P4 | X  | 130410160 | 130410160 | Misense_Mutation  | SNP     | -                                 | -                                 | A             | IGSF1:NM_001170961:exon15:c.2 686G>T p.V86L                                        | 33.33 | NM_001170961 |
| AMER1    | P4 | X  | 63412647  | 63412648  | Frame_Shift_Ins   | INS     | -                                 | -                                 | A             | AMER1:NM_152424:exon2:c.519d upT p.S174fs                                          | 65.15 | NM_152424    |
