# Supplementary material for: Establishment of a large-scale patient-derived high-risk colorectal adenoma organoid biobank for high-throughput and high-content drug screening
Source: Springer Nature journal article supplement (doi:10.1186/s12916-023-03034-y), 2023-09-04
Supplement: MOESM1 [file 26003020]

## Supplementary materials

### Establishment of a large-scale Patient-derived High-Risk Colorectal Adenoma

#### Organoid biobank for high-throughput and high-content drug screening

Zhongguang Luo<sup>1,5</sup>, Bangting Wang<sup>1,5</sup>, Feifei Luo<sup>1,5</sup>, Yumeng Guo<sup>1,5</sup>, Ning Jiang<sup>2</sup>, Jinsong Wei<sup>2</sup>, Xin Wang<sup>2</sup>, Yujen Tseng<sup>1</sup>, Jian Chen<sup>1</sup>, Bing Zhao<sup>2,4\*</sup>, and Jie Liu<sup>1,3\*</sup>

<sup>1</sup>Department of Digestive Diseases, Huashan Hospital, Fudan University, Shanghai 200040, China;

<sup>2</sup>State Key Laboratory of Genetic Engineering, School of Life Sciences, Zhongshan Hospital, Fudan University, Shanghai 200438, China;

<sup>3</sup>Institute of Biomedical Sciences and Department of Immunology, School of Basic Medical Sciences, Fudan University, Shanghai, 200032, China;

<sup>4</sup>Institute of Organoid Technology, Kunming Medical University, Kunming 650500, China.

<sup>5</sup>These authors contributed equally to this work.

\*Correspondence: [bingzhao@fudan.edu.cn](mailto:bingzhao@fudan.edu.cn) (B.Z.), [jieliu@fudan.edu.cn](mailto:jieliu@fudan.edu.cn) (J.L.)

## Supplemental Figures

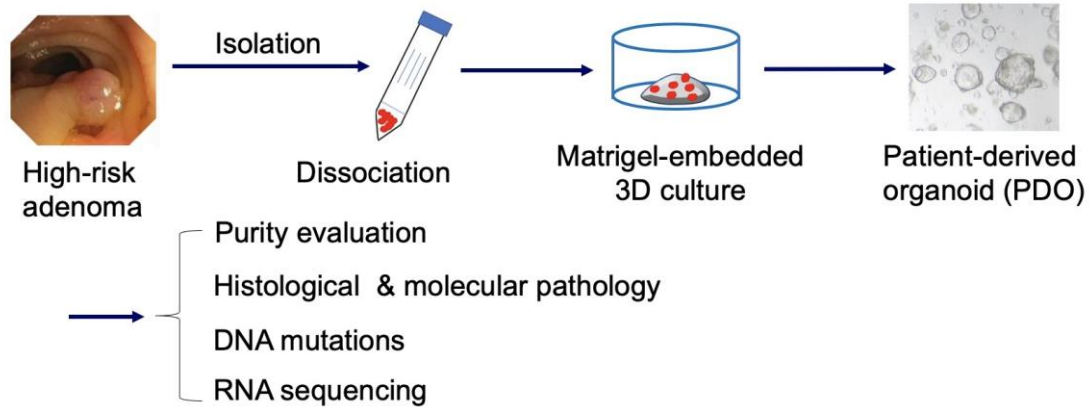

**Figure S1.** Workflow of culture of patient-derived high-risk colorectal adenoma organoids

HRCA-PDOs.

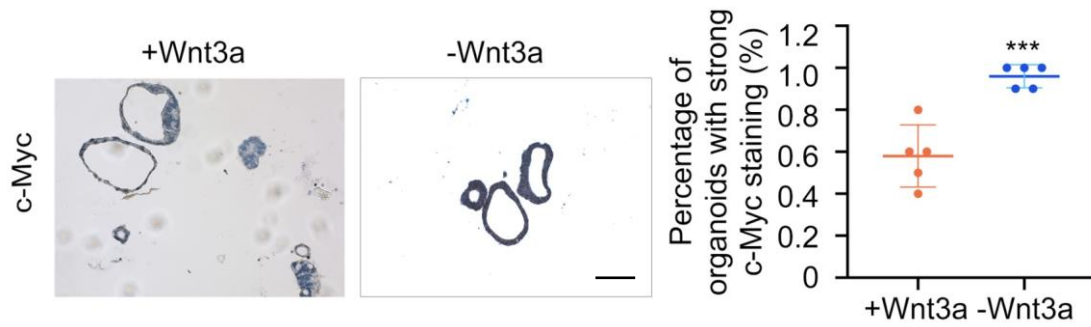

**Figure S2. The HRCA-PDOs were purified in Wnt3a-deficient culture condition.** The patient-derived HRCA samples were digested and divided into two parts for organoid culture with the medium with (+Wnt3a) or without Wnt3a (-Wnt3a). The PDO cultures from Pa2 were obtained for immunohistochemical staining of c-Myc. The representative pictures were displayed. For weak c-Myc staining as light brown, we score it as 0 and for strong c-Myc staining as dark brown or even near black, we score it as 1. Five sets of experiments were performed and the percentage of organoids with strong c-Myc staining was calculated for analysis (C, n=5). Scale bar: 100  $\mu$ m. All data were presented as mean  $\pm$  SD and subjected to Student's *t*-test: \*\*\* indicates  $P < 0.001$  as -Wnt3a versus +Wnt3a.

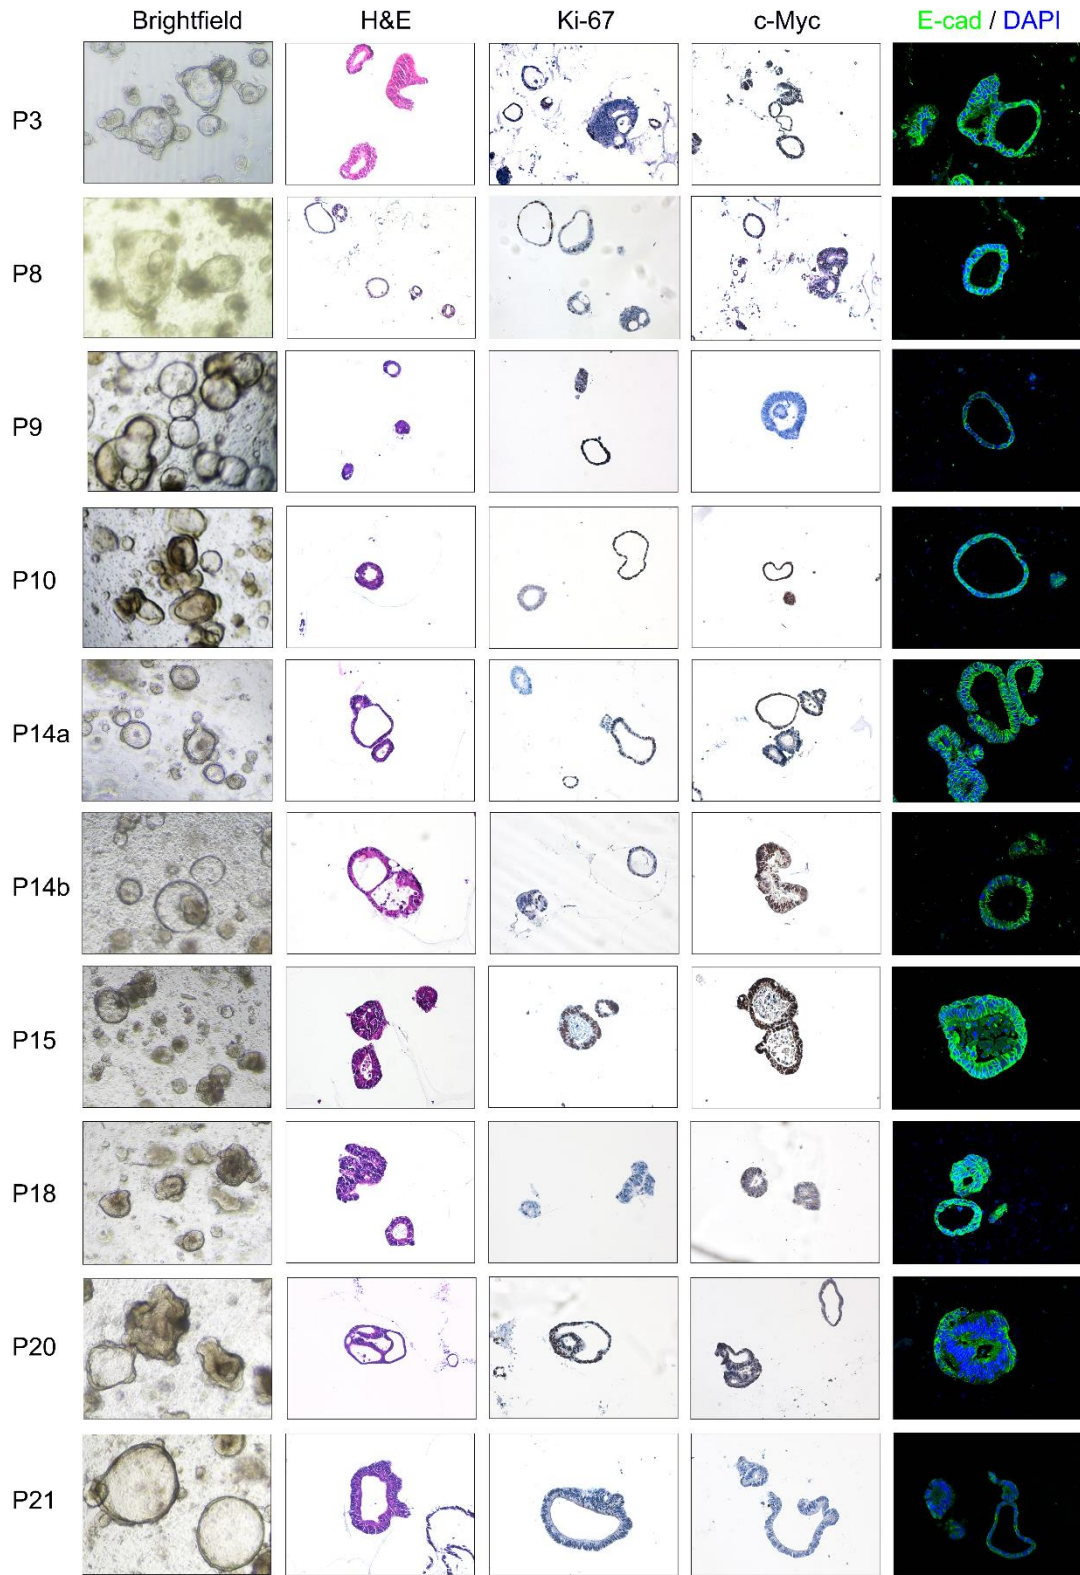

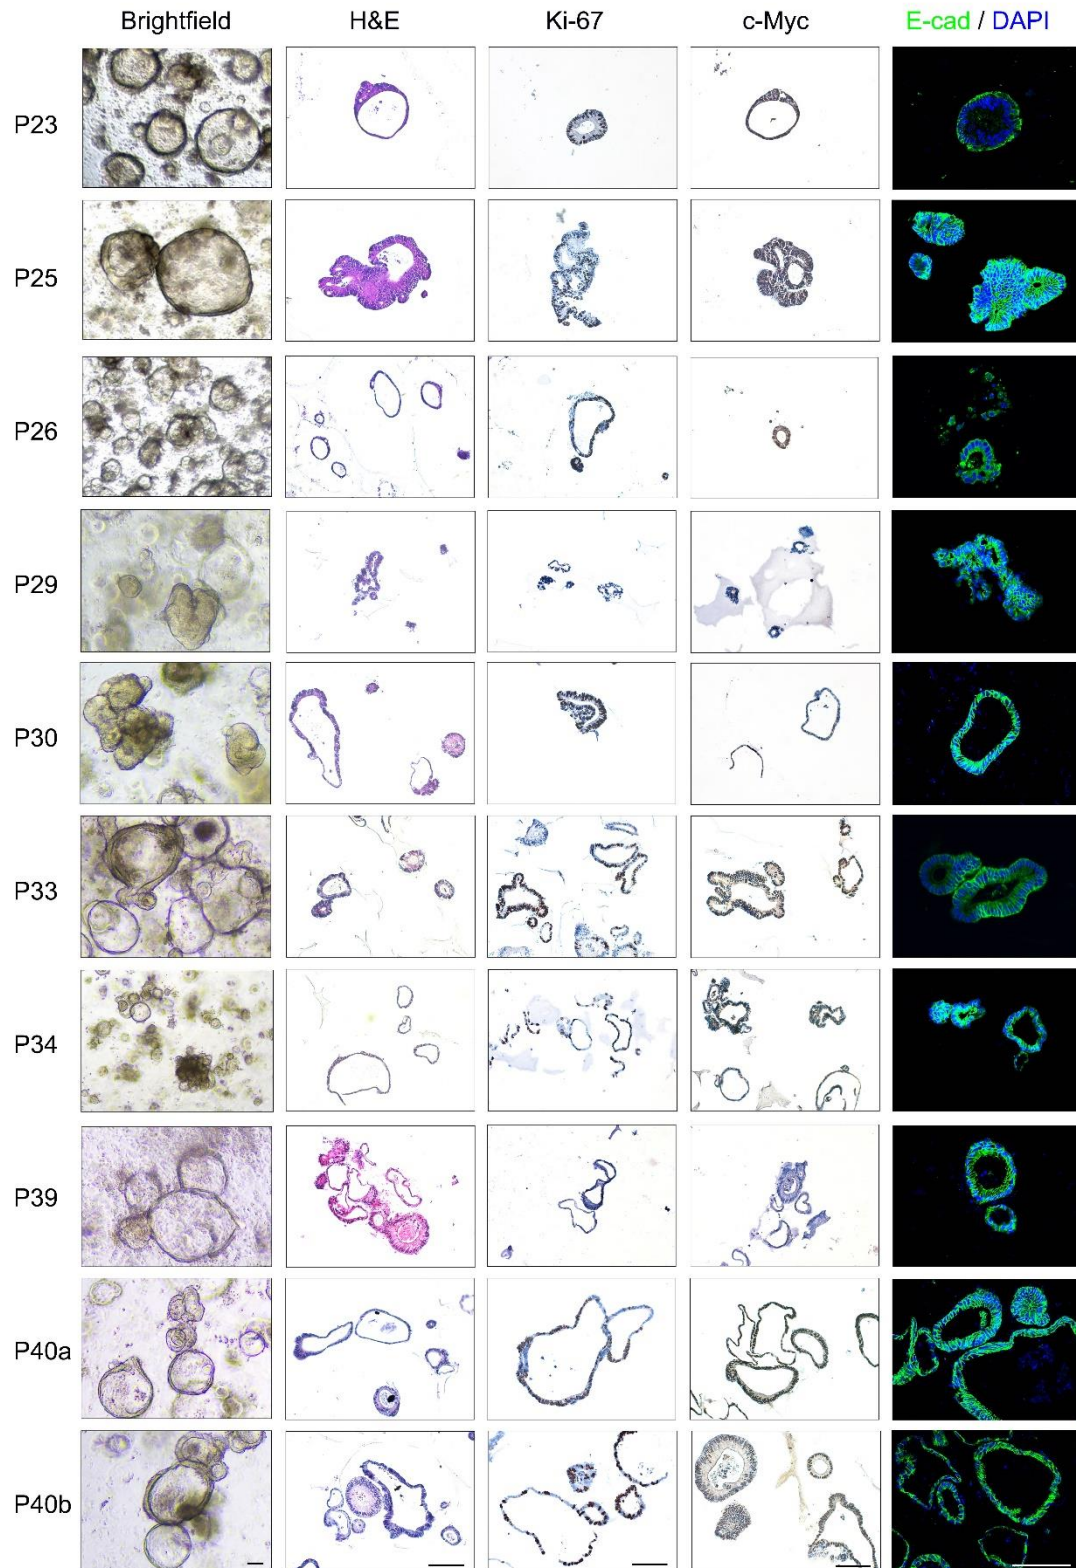

**Figure S3. Characterization of HRCA-PDO biobank derived from different patients.**

Organoid arrays showed the bright-field, H&E, Ki-67, c-Myc, and E-cad staining in 20 HRCA-PDO lines. Black and white scale bars, 50  $\mu$ m.



A

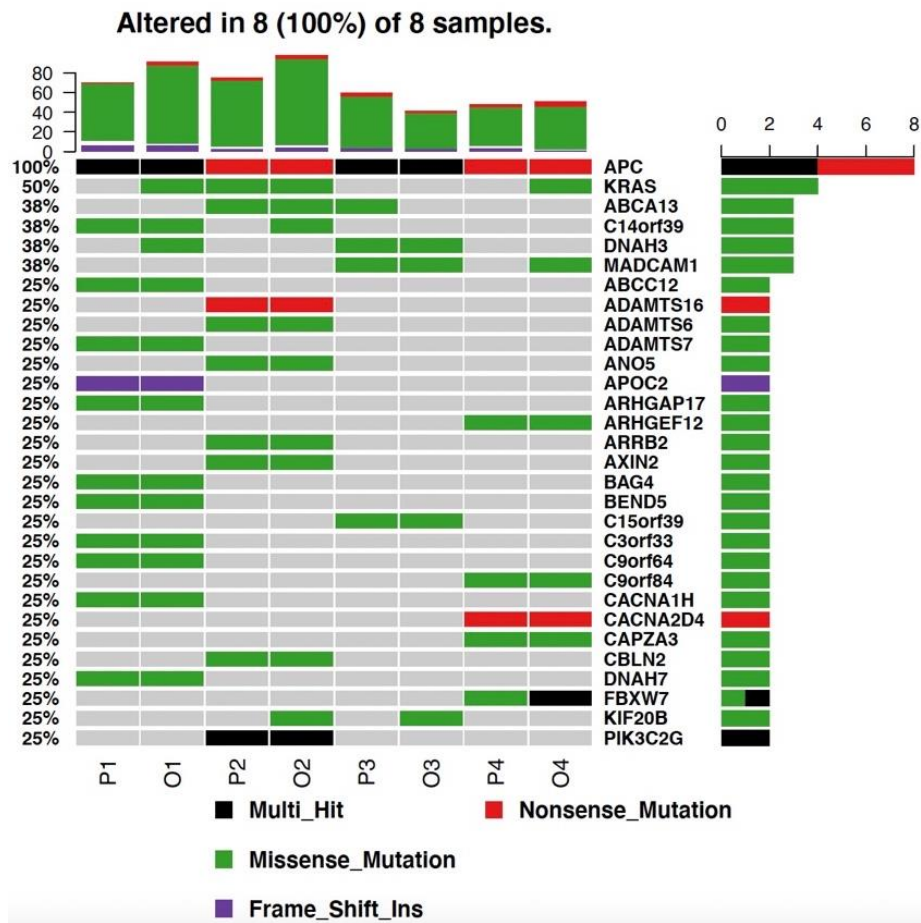

B

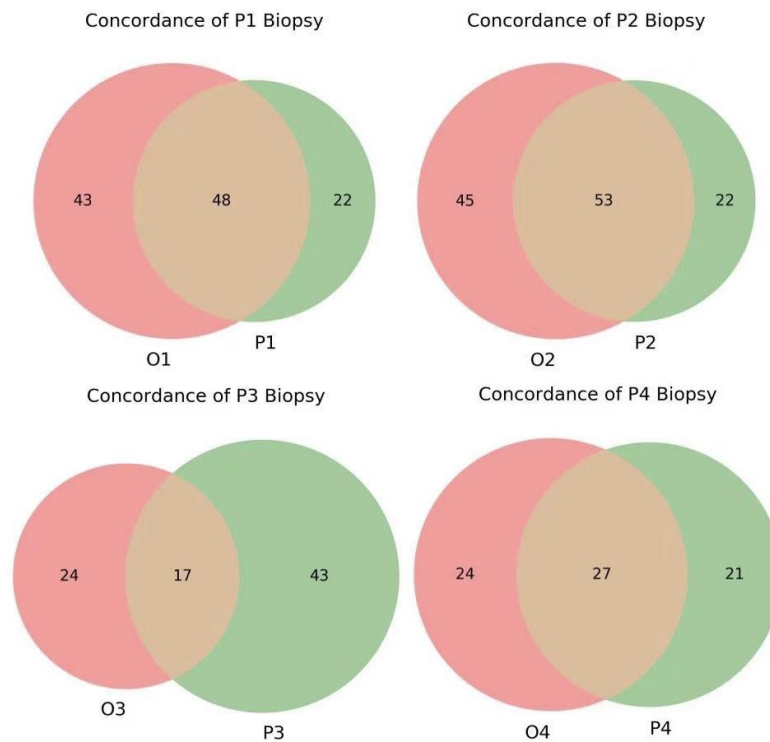

**Figure S4. The mutation landscapes of adenomas from four patients were displayed comparing to the corresponding HRCA-PDOs.** A. The types of genetic alteration (noted by color code) were displayed for the commonly mutated genes. B. The Venn diagrams indicated the number of organoid only, adenoma biopsy only and concordant mutated genes for P(O)1-4.

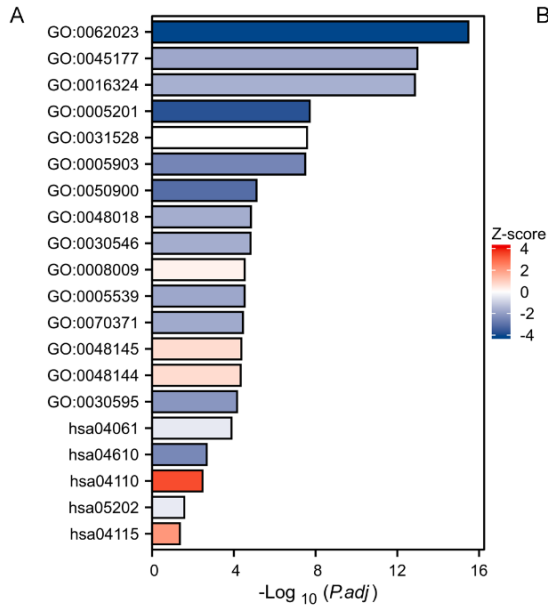

**B**

| ONTOLOGY | ID         | Description                                                   | p.adjust    | zscore      |
|----------|------------|---------------------------------------------------------------|-------------|-------------|
| BP       | GO:0050900 | leukocyte migration                                           | 7.74815E-06 | -3.13049517 |
| BP       | GO:0048732 | gland development                                             | 7.74815E-06 | 0.288675135 |
| BP       | GO:0048145 | regulation of fibroblast proliferation                        | 4.29438E-05 | 0.727606875 |
| BP       | GO:0048144 | fibroblast proliferation                                      | 4.62584E-05 | 0.727606875 |
| BP       | GO:0030595 | leukocyte chemotaxis                                          | 6.95385E-05 | -2.19089023 |
| CC       | GO:0062023 | collagen-containing extracellular matrix                      | 3.34543E-16 | -4.34121571 |
| CC       | GO:0045177 | apical part of cell                                           | 1.04169E-13 | -1.80739223 |
| CC       | GO:0016324 | apical plasma membrane                                        | 1.37503E-13 | -1.63299316 |
| CC       | GO:0031528 | microvillus membrane                                          | 2.61649E-08 | 0           |
| CC       | GO:0005903 | brush border                                                  | 3.2015E-08  | -2.5584086  |
| MF       | GO:0005201 | extracellular matrix structural constituent                   | 1.92747E-08 | -3.77171134 |
| MF       | GO:0048018 | receptor ligand activity                                      | 1.45434E-05 | -1.69705627 |
| MF       | GO:0030546 | signaling receptor activator activity                         | 1.52452E-05 | -1.69705627 |
| MF       | GO:0008009 | chemokine activity                                            | 2.95301E-05 | 0.277350098 |
| MF       | GO:0005539 | glycosaminoglycan binding                                     | 2.97288E-05 | -1.82574186 |
| KEGG     | hsa04061   | Viral protein interaction with cytokine and cytokine receptor | 0.000130239 | -0.4472136  |
| KEGG     | hsa04610   | Complement and coagulation cascades                           | 0.00213088  | -2.5        |
| KEGG     | hsa04110   | Cell cycle                                                    | 0.00340318  | 3.441236008 |
| KEGG     | hsa05202   | Transcriptional misregulation in cancer                       | 0.0265519   | -0.42640143 |
| KEGG     | hsa04115   | p53 signaling pathway                                         | 0.043658599 | 2.110579412 |

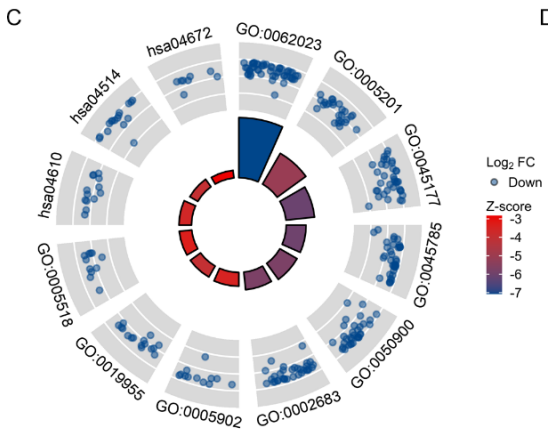

**D**

| ONTOLOGY | ID         | Description                                  | p.adjust    | zscore       |
|----------|------------|----------------------------------------------|-------------|--------------|
| BP       | GO:0045785 | positive regulation of cell adhesion         | 3.61492E-06 | -6           |
| BP       | GO:0050900 | leukocyte migration                          | 3.61492E-06 | -5.744562647 |
| BP       | GO:0002683 | negative regulation of immune system process | 1.30691E-05 | -5.744562647 |
| CC       | GO:0062023 | collagen-containing extracellular matrix     | 1.02016E-16 | -7.071067812 |
| CC       | GO:0045177 | apical part of cell                          | 1.70207E-08 | -6.08276253  |
| CC       | GO:0005902 | microvillus                                  | 0.000138334 | -3.464101615 |
| MF       | GO:0005201 | extracellular matrix structural constituent  | 2.87789E-10 | -5.099019514 |
| MF       | GO:0019955 | cytokine binding                             | 0.000273683 | -4           |
| MF       | GO:0005518 | collagen binding                             | 0.0002675   | -3.31662479  |
| KEGG     | hsa04610   | Complement and coagulation cascades          | 0.000302301 | -3.805551275 |
| KEGG     | hsa04514   | Cell adhesion molecules                      | 0.002133318 | -4           |
| KEGG     | hsa04672   | Intestinal immune network for IgA production | 0.005601088 | -2.828427125 |

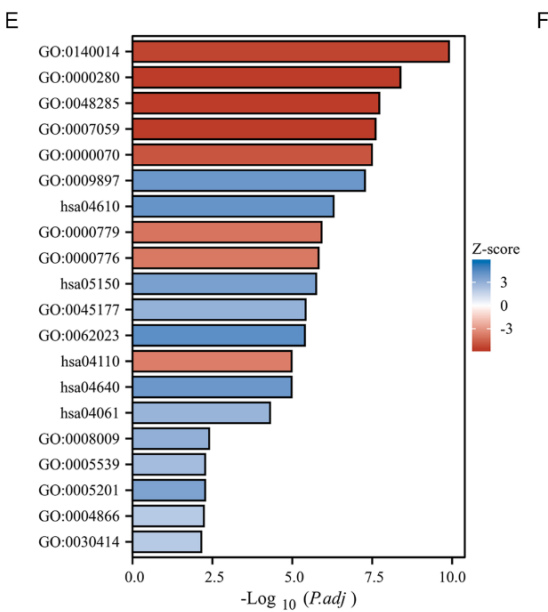

**F**

| ONTOLOGY | ID         | Description                                                   | p.adjust    | zscore       |
|----------|------------|---------------------------------------------------------------|-------------|--------------|
| BP       | GO:0140014 | mitotic nuclear division                                      | 1.25546E-10 | -5.333333333 |
| BP       | GO:0000280 | nuclear division                                              | 4.13882E-09 | -5.863527299 |
| BP       | GO:0048285 | organelle fission                                             | 1.89636E-08 | -5.642447102 |
| BP       | GO:0007059 | chromosome segregation                                        | 2.48869E-08 | -5.916079783 |
| BP       | GO:0000070 | mitotic sister chromatid segregation                          | 3.22721E-08 | -4.898979486 |
| CC       | GO:0009897 | external side of plasma membrane                              | 5.33971E-08 | 4.003203845  |
| CC       | GO:0000779 | condensed chromosome, centromeric region                      | 1.21504E-06 | -4.024922359 |
| CC       | GO:0000776 | kinetochore                                                   | 1.51075E-06 | -3.900067476 |
| CC       | GO:0045177 | apical part of cell                                           | 3.83094E-06 | 2.959320151  |
| CC       | GO:0062023 | collagen-containing extracellular matrix                      | 4.04958E-06 | 4.351941399  |
| MF       | GO:0008009 | chemokine activity                                            | 0.004002726 | 3            |
| MF       | GO:0005201 | extracellular matrix structural constituent                   | 0.005336834 | 3.5          |
| MF       | GO:0005539 | glycosaminoglycan binding                                     | 0.005336834 | 2.523573073  |
| MF       | GO:0004866 | endopeptidase inhibitor activity                              | 0.005855025 | 2            |
| MF       | GO:0030414 | peptidase inhibitor activity                                  | 0.007032072 | 2            |
| KEGG     | hsa04610   | Complement and coagulation cascades                           | 5.10618E-07 | 4.123105626  |
| KEGG     | hsa05150   | Staphylococcus aureus infection                               | 1.79296E-06 | 3.638034376  |
| KEGG     | hsa04640   | Hematopoietic cell lineage                                    | 1.05422E-05 | 4            |
| KEGG     | hsa04110   | Cell cycle                                                    | 1.05422E-05 | -3.771236166 |
| KEGG     | hsa04061   | Viral protein interaction with cytokine and cytokine receptor | 4.96893E-05 | 2.840187787  |



**Figure S5. GO and KEGG analysis based on DEGs.** (A-B) Function enriched analysis for DEGs between adenoma and mucosa. (C-D) GO and KEGG analysis based on downregulated DEGs between adenoma and mucosa. (D-E) Function enriched analysis for DEGs between adenoma and CA organoid.

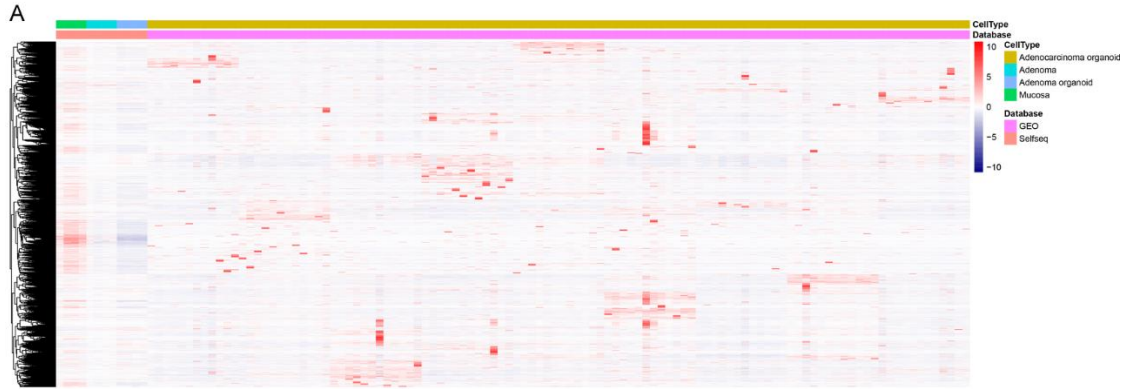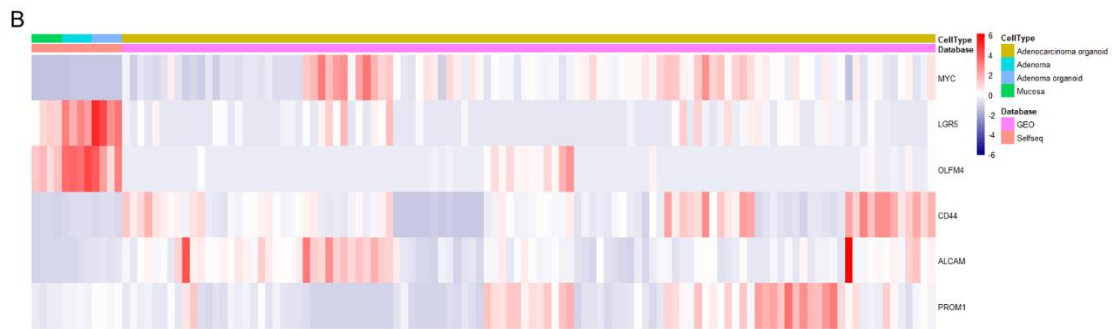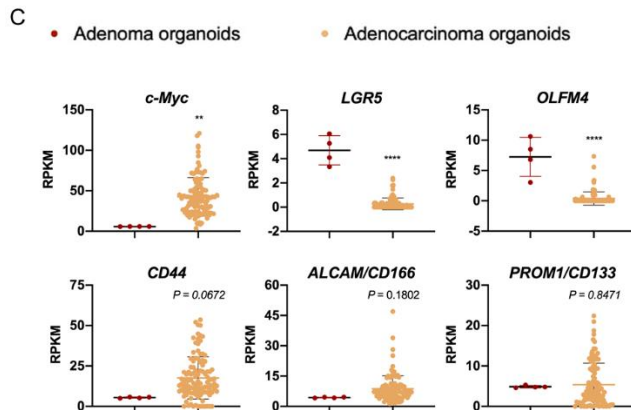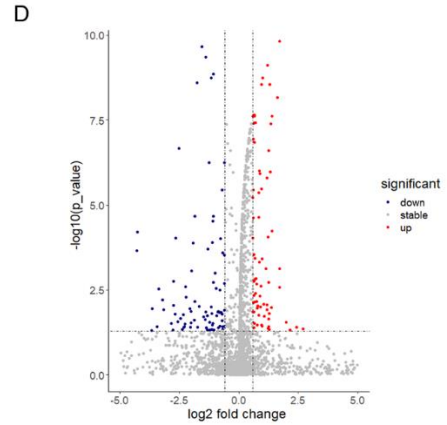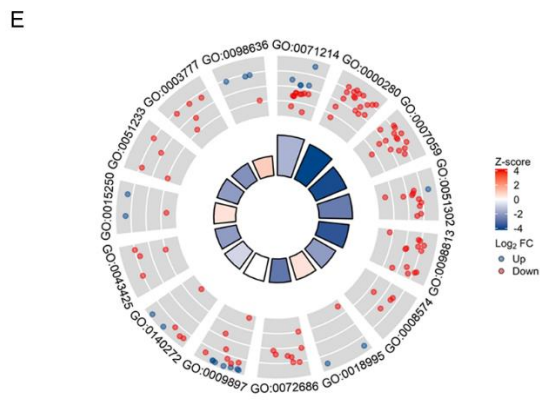

**F**

| ONTOLOGY | ID         | Description                                  | p.adjust    | zscore      |
|----------|------------|----------------------------------------------|-------------|-------------|
| BP       | GO:0071214 | cellular response to abiotic stimulus        | 0.000299292 | -1.5        |
| BP       | GO:0000280 | nuclear division                             | 0.000523993 | -4.24264069 |
| BP       | GO:0007059 | chromosome segregation                       | 0.001563114 | -3.87298335 |
| BP       | GO:0051302 | regulation of cell division                  | 0.001563114 | -2.7136021  |
| BP       | GO:0098813 | nuclear chromosome segregation               | 0.003244695 | -3.60555128 |
| CC       | GO:0018995 | host cellular component                      | 0.014931945 | 0.577350269 |
| CC       | GO:0072686 | mitotic spindle                              | 0.014931945 | -2.82842712 |
| CC       | GO:0009897 | external side of plasma membrane             | 0.014931945 | 0           |
| CC       | GO:0051233 | spindle midzone                              | 0.024239128 | -2          |
| CC       | GO:0098636 | protein complex involved in cell adhesion    | 0.040050635 | 1           |
| MF       | GO:0008574 | plus-end-directed microtubule motor activity | 0.009667418 | -2          |
| MF       | GO:0140272 | exogenous protein binding                    | 0.020042056 | -0.81649658 |
| MF       | GO:0043425 | bHLH transcription factor binding            | 0.023301734 | -2          |
| MF       | GO:0015250 | water channel activity                       | 0.023301734 | 0.577350269 |
| MF       | GO:0003777 | microtubule motor activity                   | 0.037708941 | -2.23606798 |

**Figure S6. Comparison of gene expression profiles between colorectal adenoma organoids and adenocarcinoma organoids.** (A) Clustered heatmap of RPKMs of 2689 genes expressed in mucosa, adenoma, adenoma organoids (RNA-seq results as Figure 3A) and adenocarcinoma organoids (data from GSE65253) after normalization. (B) Clustered heatmap of RPKMs of *c-Myc*, *LGR5*, *OLFM4*, *CD44*, *CD166 (ALCAM)* and *CD133 (PROM1)* expressed in four groups. (C) The results of RPKMs of *c-Myc*, *LGR5*, *OLFM4*, *CD44*, *CD166 (ALCAM)* and *CD133 (PROM1)* in adenoma organoids and adenocarcinoma organoids were plotted for comparison. All data were presented as mean  $\pm$  SD (n = 4 in adenoma organoid group, n=108 in adenocarcinoma organoid group) and subjected to Student's *t*-test. \*\* indicates  $P < 0.01$ . \*\*\*\* indicates  $P < 0.0001$ . (D) The volcano plot showed the 194 DEGs (117 downregulated and 77 upregulated,  $P_{adj} < 0.05$ ) in adenocarcinoma organoids versus adenoma organoids. (E-F) GO analysis based on DEGs.

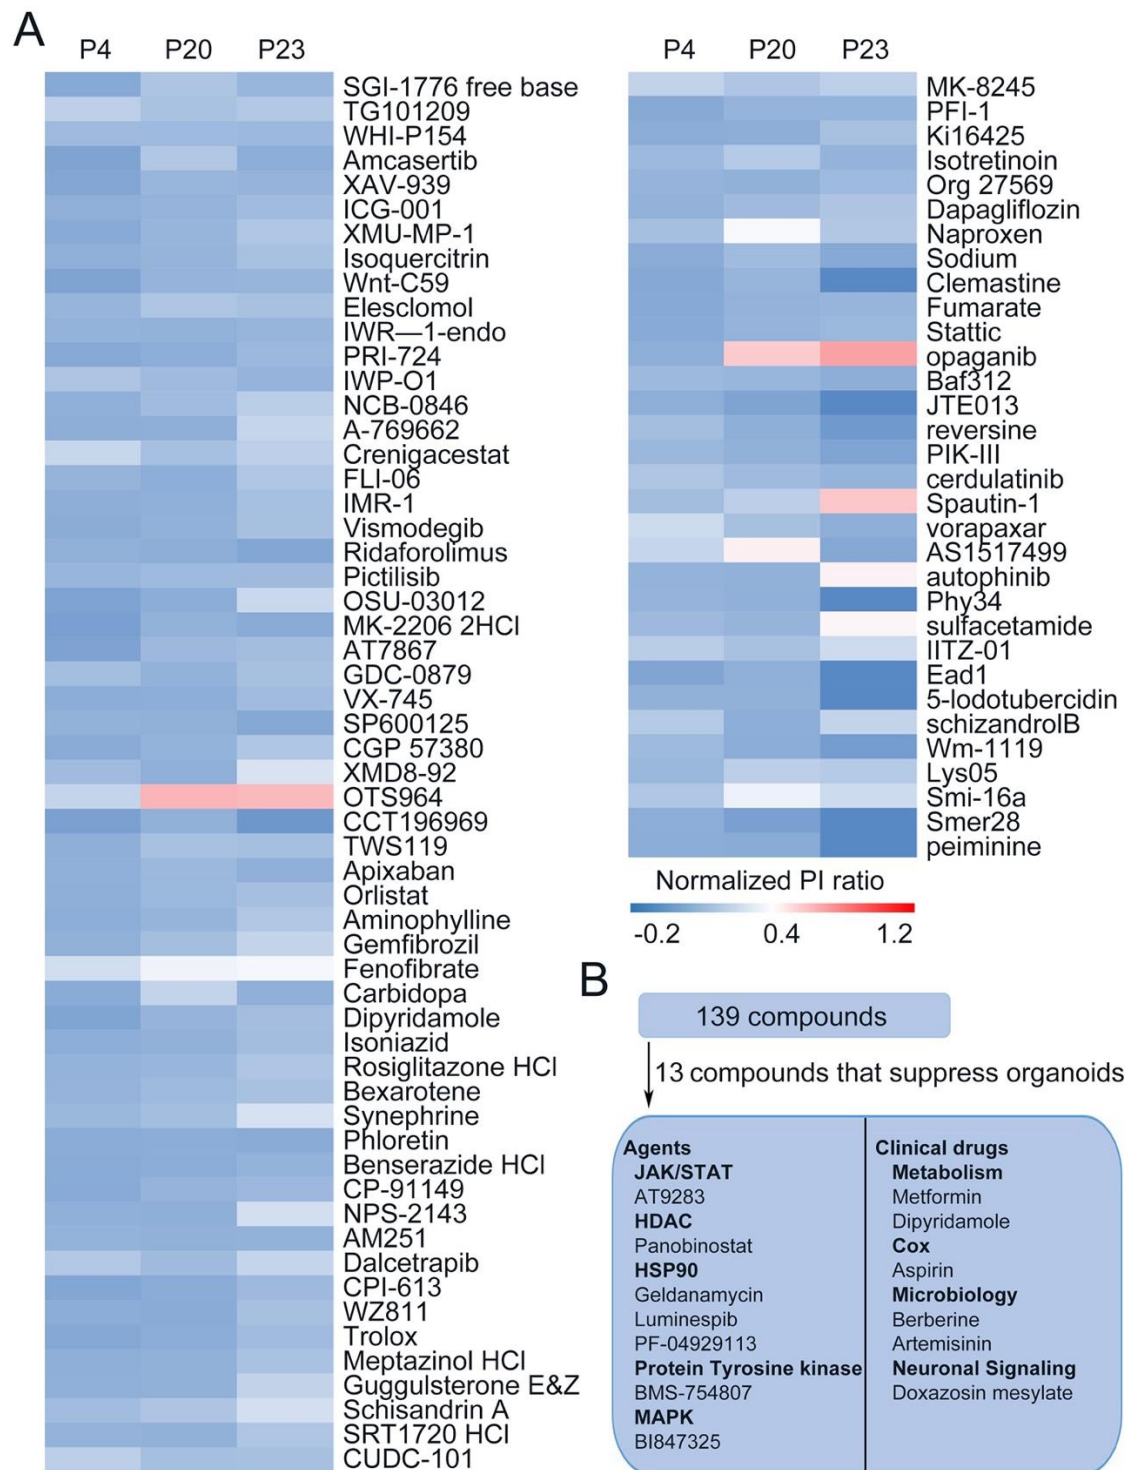

**Figure S7. High-throughput screening of a compound library with the human HRCA-**

**PDOs.** (A) Heatmap showed normalized PI ratio (PI/Hoechst) in 3 CA organoid lines (P4,

P20 and P23) after treatment of 108 compounds. Colors range from blue (low mortality) to

red (high mortality). P, patient. (B) Drug screening in CA organoids using a compound library. From a library of 139 compounds (108 compounds plus 31 compounds in Figure 3B), we successfully screened out 12 compounds that were able to significantly suppress organoid growth.

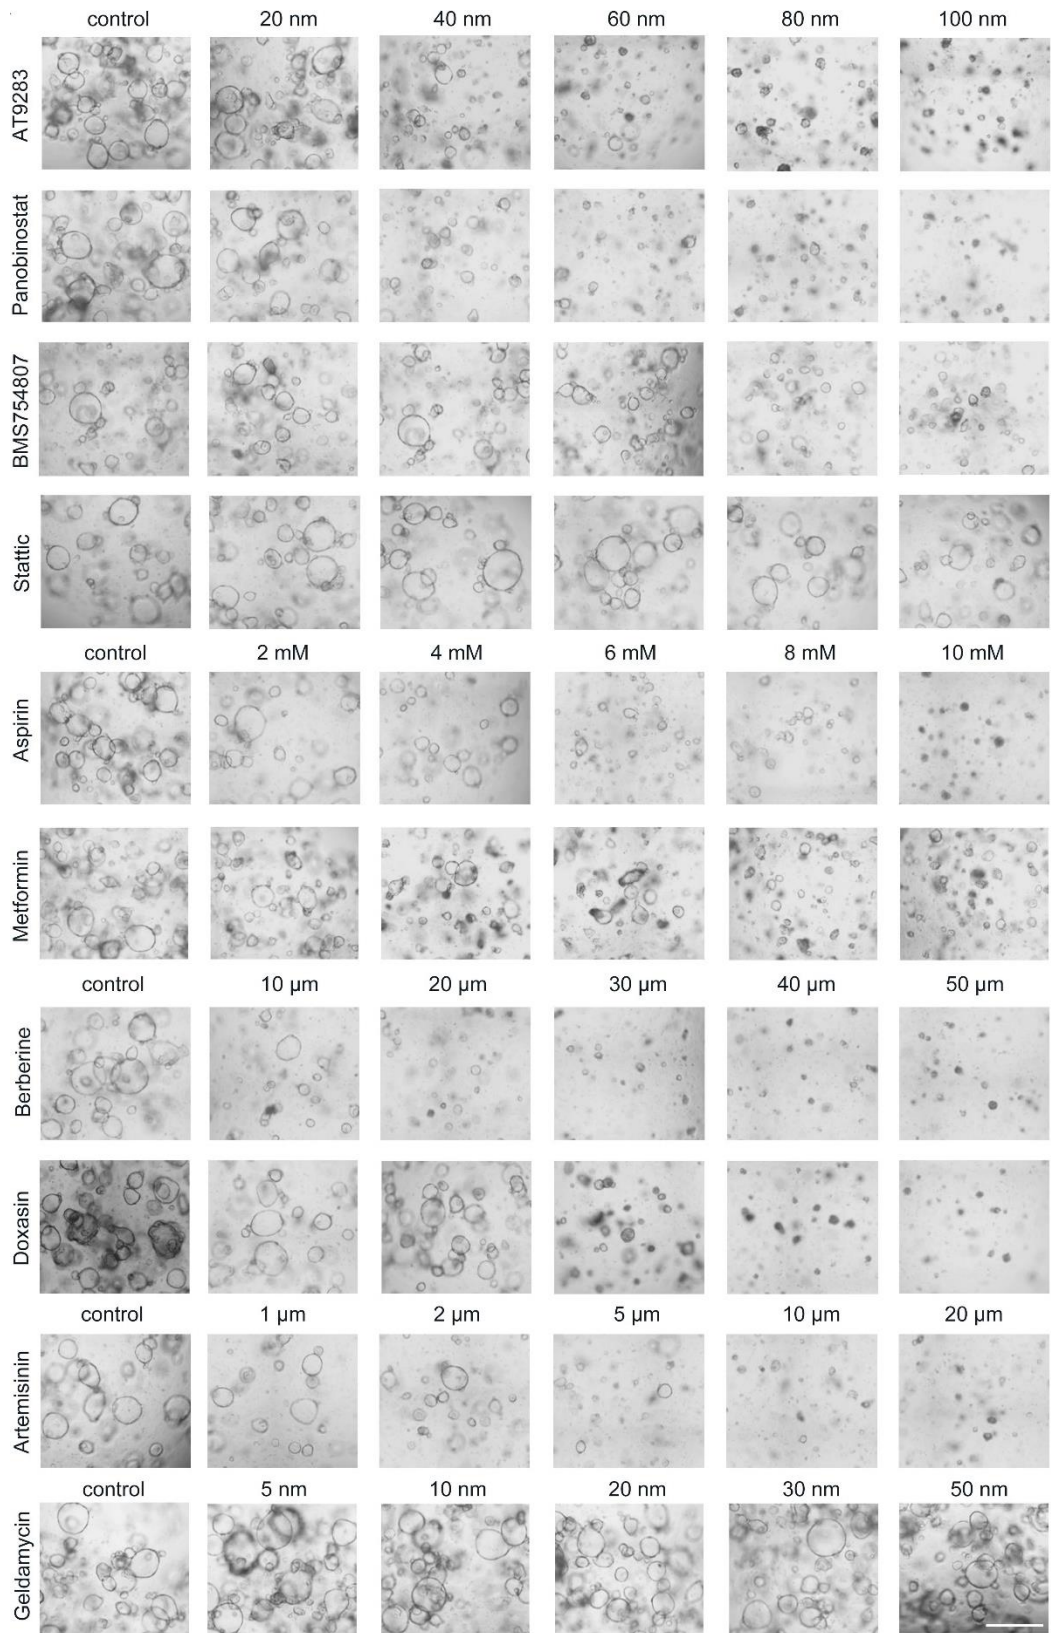



**Figure S8. Compounds affect the morphology of HRCA organoids in a dose-dependent manner.** Compared with Stattic and Geldamycin, those candidate hits including AT9283, Panobinostat, BMS754807, Aspirin, Metformin, Doxazosin, Berberine and Artemisinin inhibited the surface area and the transparency of organoids in a dose-dependent manner. Especially, AT9283 (40 nM), Panobinostat (40 nM), Metformin (6 mM) and Berberine (10  $\mu$ M) significantly reduced the surface area and transmittance of organoids at indicated concentrations. White scale bar, 500  $\mu$ m.

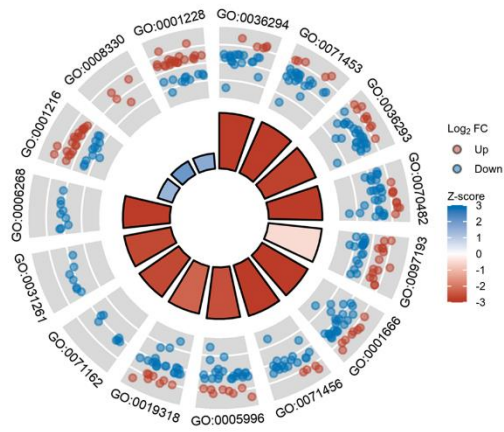

| ONTOLOGY | ID         | Description                                                              | p.adjust    |
|----------|------------|--------------------------------------------------------------------------|-------------|
| BP       | GO:0036294 | cellular response to decreased oxygen levels                             | 5.17E-07    |
| BP       | GO:0071453 | cellular response to oxygen levels                                       | 5.17E-07    |
| BP       | GO:0036293 | response to decreased oxygen levels                                      | 5.41E-07    |
| BP       | GO:0070482 | response to oxygen levels                                                | 9.01E-07    |
| BP       | GO:0097193 | intrinsic apoptotic signaling pathway                                    | 9.05E-07    |
| BP       | GO:0001666 | response to hypoxia                                                      | 1.18E-06    |
| BP       | GO:0071456 | cellular response to hypoxia                                             | 1.18E-06    |
| BP       | GO:0005996 | monosaccharide metabolic process                                         | 1.73E-06    |
| BP       | GO:0019318 | hexose metabolic process                                                 | 4.48E-06    |
| BP       | GO:0006268 | DNA unwinding involved in DNA replication                                | 6.83E-06    |
| CC       | GO:0071162 | CMG complex                                                              | 5.11E-06    |
| CC       | GO:0031261 | DNA replication preinitiation complex                                    | 5.96E-06    |
| MF       | GO:0001216 | DNA-binding transcription activator activity                             | 0.098790377 |
| MF       | GO:0008330 | protein tyrosine/threonine phosphatase activity                          | 0.098790377 |
| MF       | GO:0001228 | DNA-binding transcription activator activity, RNA polymerase II-specific | 0.098790377 |

**Figure S9. Gene Ontology analysis for the DEGs between metformin-treated and control HRCA-PDOs.**

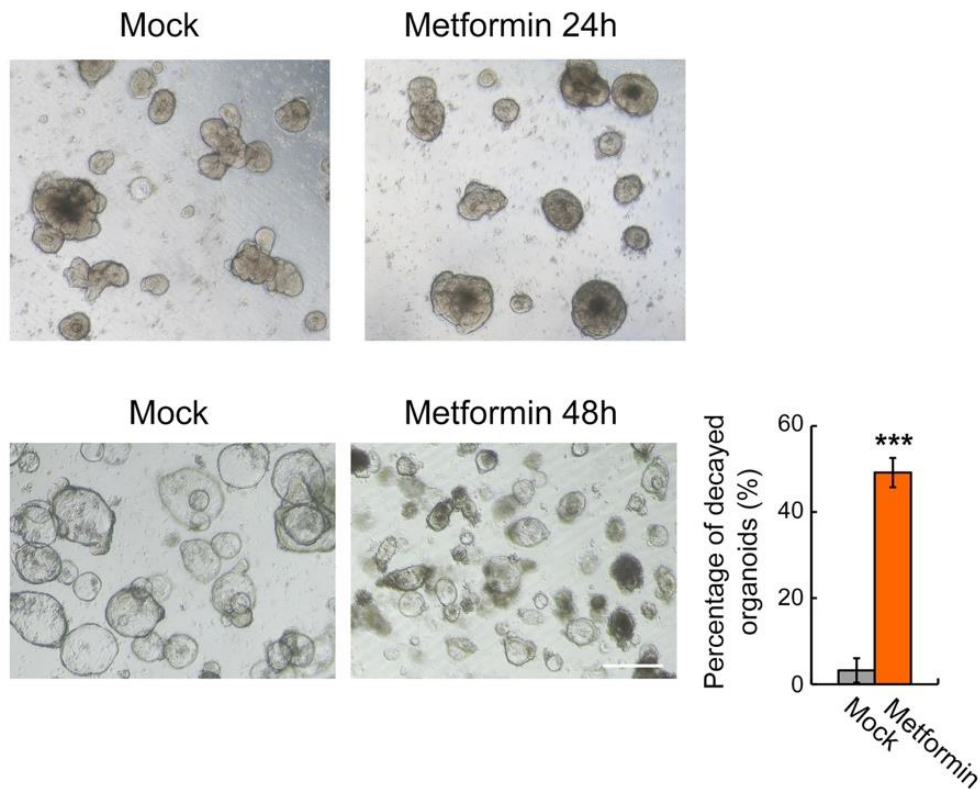

**Figure S10. Metformin treatment led to a substantial decay of HRCA-PDOs after 48 hours.** After metformin (5 mM) treatment for 24 hours, the bright-field images showed no obvious change on the morphology of HRCA-PDOs (upper panel), but indicated that metformin led to a substantial decay of HRCA-PDOs after 48 h treatment (lower panel). Scale bar, 100  $\mu$ m. All data were presented as mean $\pm$ SD (n = 6) and subjected to Student's *t*-test. \*\*\* indicates  $P < 0.001$ .

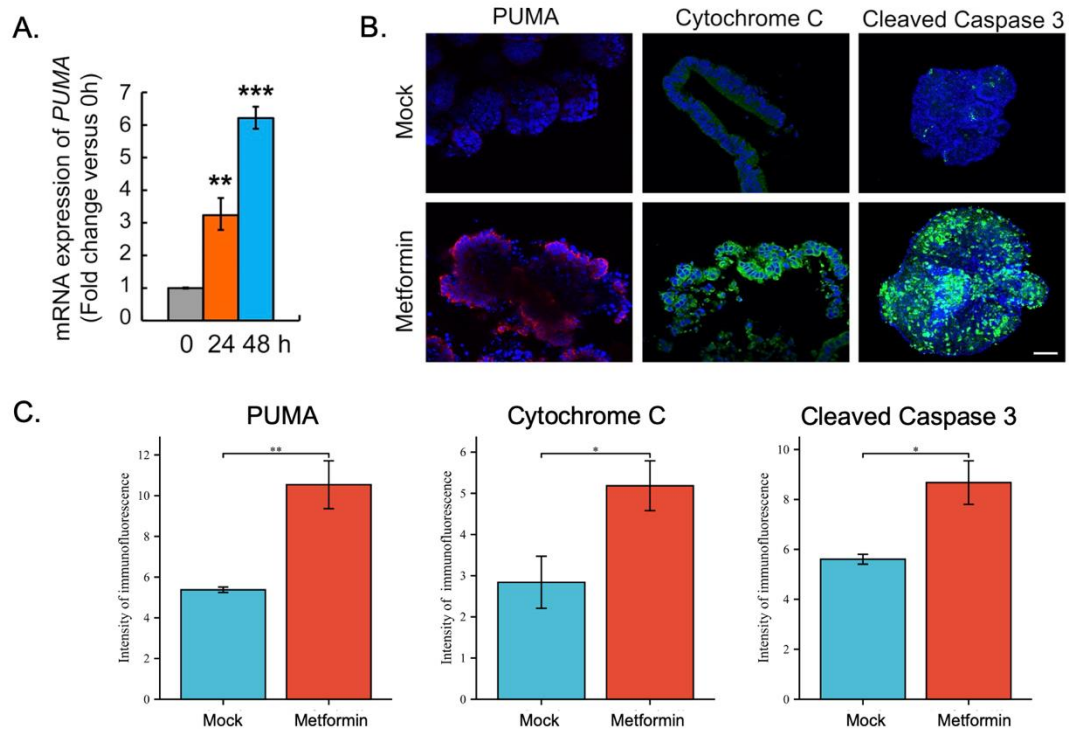

**Figure S11. Metformin treatment promoted apoptosis in HRCA-PDOs.** After the metformin treatment for 48 h, HRCA-PDOs were harvested to examine the expression of *PUMA* by qRT-PCR (A), as well as stained for PUMA (red), cytochrome-C (green), cleaved caspase-3 (green) and DAPI (blue), then subject to confocal cross-sectioning (B). The intensity of immunostaining was quantified by ImageJ software. A representative result of three independent experiments was shown. Scale bar, 50  $\mu$ m. All data were presented as mean $\pm$ S.D (n = 4-6, A; n=12, C) and subjected to One-way ANOVA followed by the Bonferroni *post hoc* test in A, and subjected to Student *t*-test in C. \* indicates  $P < 0.05$ , \*\* indicates  $P < 0.01$  and \*\*\* indicates  $P < 0.001$  versus mock group.

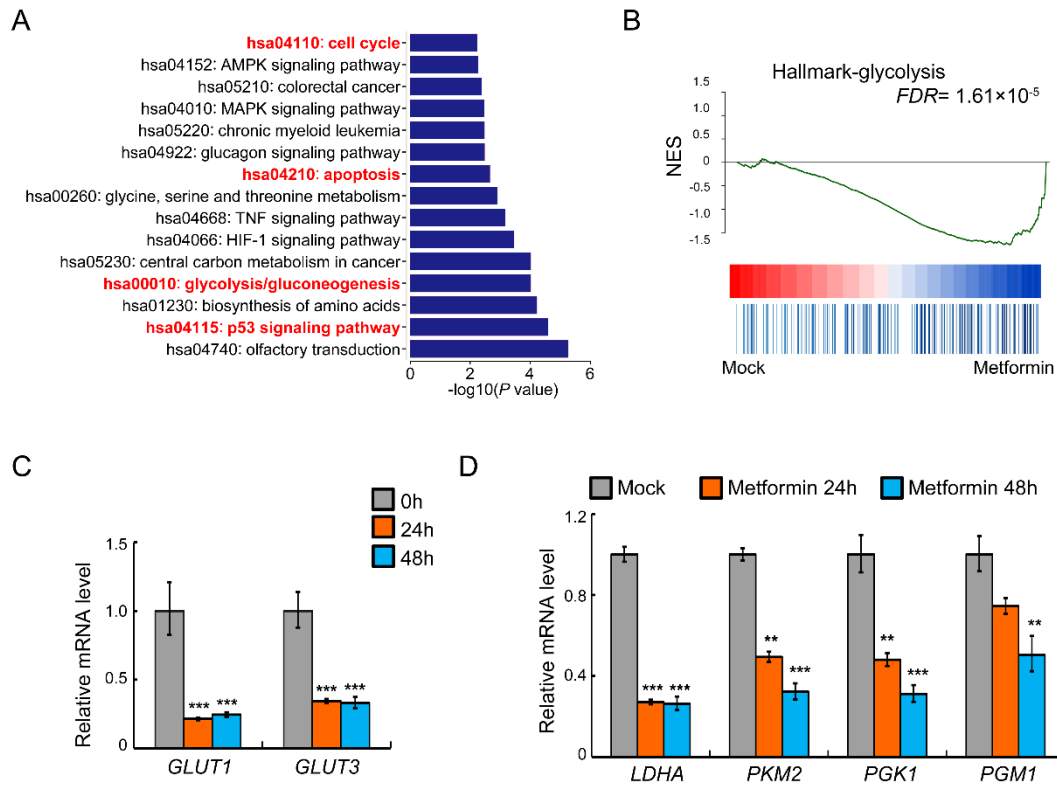

**Figure S12. Metformin regulated the glycolysis of colorectal adenoma.** (A) GSEA indicated significant enrichment of DEGs involved in “p53 signaling pathway”, “apoptosis” and “cell cycle” (red). (B) GSEA illustrated intensively down-regulated genes involved in glycolysis among metformin treatment group. (FDR= $1.61 \times 10^{-5}$ ). (C) CA organoids were harvested to examine the expression of *GLUT1/3* using qRT-PCR after metformin (5 mM, 24 h, 48 h) treatment. (D) CA organoids were harvested to examine the expression of *LDHA*, *PKM2*, *PGK1*, *PGM1* using qRT-PCR. All data were presented as mean  $\pm$  SD (n = 4-5) and subjected to One-way ANOVA by the Bonferroni post hoc test \*\*\* indicates  $p < 0.001$ . \*\* indicates  $p < 0.01$ . \* indicates  $p < 0.05$ .

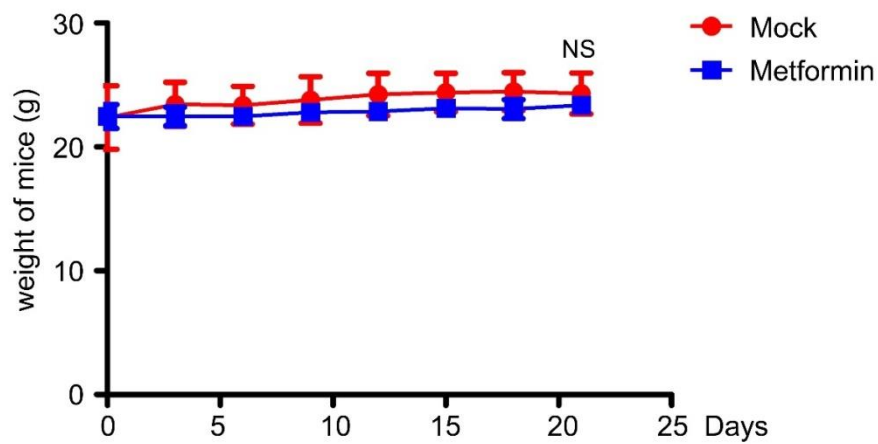

**Figure S13. Body weight changes in mice during metformin intervention.** The weight of mice in the control (PBS, n = 5) and treatment (metformin, n = 4) group was measured every 3 days for 3 weeks. All data were presented as mean±S.D and Student-t test was performed at each time point. NS indicates no significant difference.



## Supplemental Tables

**Table S1. The biobank of Patients-derived HRCA organoids (HRCA-PDOs).**

| Case | Sex    | Age | Size(mm) | Location         | Pathology                                                | Single/Multiple lesions | Risk | Organoid culture |
|------|--------|-----|----------|------------------|----------------------------------------------------------|-------------------------|------|------------------|
| P1   | female | 72  | 10*15    | sigmoid colon    | tubular adenoma                                          | multiple                | high | yes              |
| P2   | female | 53  | 10*15    | sigmoid colon    | tubular adenoma                                          | multiple                | high | yes              |
| P3   | man    | 57  | 10*10    | sigmoid colon    | tubular adenoma                                          | single                  | high | no               |
| P4   | female | 66  | 12*10    | sigmoid colon    | tubular adenoma                                          | single                  | high | yes              |
| P5   | female | 73  | 15*15    | sigmoid colon    | villous adenoma                                          | single                  | high | yes              |
| P6   | man    | 61  | 20*15    | descending colon | Villous tubular adenoma                                  | multiple                | high | yes              |
| P7   | man    | 72  | 10*8     | rectum           | tubular adenoma                                          | single                  | low  | yes              |
| P8   | man    | 70  | 10*8     | rectum           | tubular adenoma                                          | single                  | low  | no               |
| P9   | female | 65  | 12*8     | sigmoid colon    | tubular adenoma                                          | multiple                | high | yes              |
| P10  | man    | 68  | 10*8     | sigmoid colon    | tubular adenoma                                          | multiple                | high | yes              |
| P11  | female | 67  | 10*8     | transverse colon | tubular adenoma                                          | multiple                | high | yes              |
| P12  | man    | 67  | 10*15    | ascending colon  | tubular adenoma                                          | multiple                | high | yes              |
| P13  | man    | 69  | 18*10    | sigmoid colon    | Villous tubular adenoma with low-grade neoplasia         | multiple                | high | no               |
| P14  | man    | 79  | 20*25    | sigmoid colon    | Villous tubular adenoma with high-grade neoplasia (P14a) | multiple                | high | yes              |
|      |        |     | 10*12    | transverse colon | tubular adenoma (P14b)                                   |                         |      | yes              |
|      |        |     | 8*10     | ascending colon  | tubular adenoma (P14c)                                   |                         |      | yes              |
| P15  | man    | 44  | 15*15    | descending colon | Villous tubular adenoma                                  | single                  | high | yes              |
| P16  | man    | 55  | 30*30    | descending colon | Villous tubular adenoma with high-grade neoplasia        | single                  | high | yes              |
| P17  | female | 68  | 8*6      | ascending colon  | tubular adenoma                                          | single                  | low  | yes              |
| P18  | female | 62  | 10*10    | sigmoid colon    | tubular adenoma                                          | multiple                | high | yes              |
| P19  | female | 62  | 8*8      | hepatic flexure  | tubular adenoma                                          | multiple                | high | yes              |
| P20  | man    | 52  | 6*8      | sigmoid colon    | Villous tubular adenoma                                  | multiple                | high | yes              |
| P21  | man    | 62  | 8*10     | transverse colon | tubular adenoma                                          | multiple                | high | yes              |
| P22  | female | 71  | 18*15    | rectum           | tubular adenoma                                          | multiple                | high | no               |
| P23  | man    | 58  | 8*10     | hepatic flexure  | Serrated adenoma                                         | single                  | high | yes              |
| P24  | female | 64  | 12*15    | hepatic flexure  | tubular adenoma                                          | multiple                | high | yes              |
| P25  | female | 36  | 10*8     | sigmoid colon    | tubular adenoma                                          | single                  | low  | yes              |
| P26  | female | 70  | 15*15    | ascending colon  | tubular adenoma                                          | multiple                | high | yes              |
| P27  | man    | 47  | 10*15    | sigmoid colon    | tubular adenoma                                          | multiple                | high | no               |
| P28  | man    | 66  | 15*20    | sigmoid colon    | tubular adenoma                                          | multiple                | high | yes              |
|      |        |     | 10*8     | transverse colon | tubular adenoma                                          |                         |      | no               |
| P29  | man    | 53  | 12*15    | sigmoid colon    | tubular adenoma                                          | single                  | high | yes              |
| P30  | female | 77  | 10*12    | sigmoid colon    | tubular adenoma                                          | single                  | high | yes              |
| P31  | female | 78  | 12*15    | sigmoid colon    | Sessile serrated adenoma                                 | multiple                | high | yes              |
| P32  | man    | 66  | 12*15    | sigmoid colon    | tubular adenoma (P32a)                                   | multiple                | high | yes              |
|      |        |     | 12*15    | ascending colon  | tubular adenoma (P32b)                                   |                         |      | yes              |
| P33  | man    | 58  | 20*25    | descending colon | tubular adenoma (P33a)                                   | multiple                | high | yes              |
|      |        |     | 20*25    | sigmoid colon    | tubular adenoma (P33b)                                   |                         |      | yes              |
| P34  | man    | 63  | 10*10    | cecum            | tubular adenoma                                          | single                  | high | no               |
| P35  | female | 68  | 12*10    | transverse colon | tubular adenoma                                          | single                  | high | yes              |

|     |        |    |       |                  |                        |          |      |     |
|-----|--------|----|-------|------------------|------------------------|----------|------|-----|
| P36 | female | 63 | 12*15 | sigmoid colon    | tubular adenoma        | single   | high | yes |
| P37 | man    | 62 | 12*15 | rectum           | tubular adenoma        | single   | high | yes |
| P38 | female | 59 | 20*20 | hepatic flexure  | tubular adenoma        | single   | high | no  |
| P39 | man    | 58 | 8*10  | descending colon | tubular adenoma        | multiple | high | yes |
|     |        |    | 15*18 | sigmoid colon    | tubular adenoma        |          |      | no  |
| P40 | man    | 61 | 10*10 | sigmoid colon    | tubular adenoma (P40a) | multiple | high | yes |
|     |        |    | 10*10 | sigmoid colon    | tubular adenoma (P40b) |          |      | yes |

---

**Table S2. Primers for RT-qPCR.**

|           | Forward (5'-3')          | Reverse (5'-3')         |
|-----------|--------------------------|-------------------------|
| h-CD44    | CTGCCGCTTTGCAGGTGTA      | CATTGTGGGCAAGGTGCTATT   |
| h-c-Myc   | GTCAAGAGGCGAACACACAAC    | TTGGACGGACAGGATGTATGC   |
| h-CD166   | ACTTGACGTACCTCAGAACTCTCA | CATCGTCGTA CTGCACACTTT  |
| h-CD44    | CTGCCGCTTTGCAGGTGTA      | CATTGTGGGCAAGGTGCTATT   |
| h-CD133   | AGTCGGAAACTGGCAGATAGC    | GGTAGTGTTGTA CTGGGCCAAT |
| h-LGR5    | GAGTTACGTCTTGCGGGAAC     | TGGGTACGTGTCTTAGCTGATTA |
| h-OLFM4   | ACTGTCCGAATTGACATCATGG   | TTCTGAGCTTCCACCAAAACTC  |
| h-PUMA    | GACCTCAACGCACAGTACGAG    | AGGAGTCCCATGATGAGATTGT  |
| h-PGK1    | GAACAAGGTTAAAGCCGAGCC    | GTGGCAGATTGACTCCTACCA   |
| h-PGM1    | CCAAACCGACTGAAGATCCGT    | CATGTTTCGATCCCCATCTCC   |
| h-GLUT1   | TCTGGCATCAACGCTGTCTTC    | CGATACCGGAGCCAATGGT     |
| h-GLUT3   | GTGACCTTGCAACTTCATGTC    | AAATGGGACCCTGCCTTACTG   |
| h-PKM2    | ATGTCGAAGCCCCATAGTGAA    | TGGGTGGTGAATCAATGTCCA   |
| h-LDHA    | TTGACCTACGTGGCTTGAAG     | GGTAACGGAATCGGGCTGAAT   |
| h-OCT1    | ACGGTGGCGATCATGTACC      | CCCATTCTTTTGAGCGATGTGG  |
| h-OCT2    | CATCGTCACCGAGTTTAACCTG   | AGCCGATACTCATAGAGCCAAT  |
| h-SLC22A3 | CTTCCGCTTCCTGCAAGGT      | AAGTAGGCAATTCCAGGGAGA   |
| h-SLC29A4 | GCTTTCACGGATACTACATTGGA  | ATGTCAAACACGATGGAGGTC   |
| h-NOX1    | TTGTTTGGTTAGGGCTGAATGT   | GCCAATGTTGACCCAAGGATTTT |
| h-Mate1   | TTCATAAGCTCCGTGTTCTGTG   | AGTGACATTGATAACCGCGATT  |
| h-Mate2   | CAGAGGCTTTGGGACTGAGAT    | GTCACATGCCGAAGACAAACC   |
| m-C-Myc   | TAGTGCTGCATGAGGAGACA     | CATCAATTTCTTCCTCATCTTC  |
| m-Nox1    | GGTTGGGGCTGAACATTTTTC    | TCGACACACAGGAATCAGGAT   |
| m-Lgr5    | CCTACTCGAAGACTTACCCAGT   | GCATTGGGGTGAATGATAGCA   |
| m-Olfm4   | CAGCCACTTTCCAATTTCACTG   | GCTGGACATACTCCTTCACCTTA |

h, human; m, mouse.

**Table S3. Concentration of drugs in compound library.**

| Product Name                         | Concentration |
|--------------------------------------|---------------|
| S3I-201                              | 100 nM        |
| AT9283                               | 100 nM        |
| SGI-1776 free base                   | 100 nM        |
| TG101209                             | 100 nM        |
| WHI-P154 (JAK/STAT)                  | 100 nM        |
| Amcasertib (BBI503)                  | 100 nM        |
| XAV-939                              | 100 nM        |
| ICG-001                              | 100 nM        |
| XMU-MP-1                             | 100 nM        |
| Isoquercitrin                        | 100 nM        |
| Wnt-C59 (C59)                        | 100 nM        |
| Elesclomol (STA-4783)                | 100 nM        |
| IWR—1-endo                           | 100 nM        |
| PRI-724                              | 100 nM        |
| IWP-O1                               | 100 nM        |
| NCB-0846                             | 100 nM        |
| A-769662                             | 100 nM        |
| Crenigacestat (LY3039478)            | 100 nM        |
| FLI-06                               | 100 nM        |
| IMR-1                                | 100 nM        |
| Vismodegib (GDC-0449)                | 100 nM        |
| 5-Bromoindole                        | 100 nM        |
| A-674563                             | 100 nM        |
| Geldanamycin                         | 100 nM        |
| Ridaforolimus (Deforolimus, MK-8669) | 100 nM        |
| Pictilisib (GDC-09410)               | 100 nM        |
| OSU-03012 (AR-12)                    | 100 nM        |
| MK-2206 2HCl                         | 100 nM        |
| AT7867                               | 100 nM        |
| GSK2334470                           | 100 nM        |
| Luminespib (AUY-922, NVP-AUY922)     | 100 nM        |
| ETP-46464 (PI3K)                     | 100 nM        |
| PD0325901                            | 100 nM        |
| BX-795                               | 100 nM        |
| PF-04929113 (SNX-5422)               | 100 nM        |
| GDC-0879                             | 100 nM        |
| VX-745                               | 100 nM        |
| SP600125                             | 100 nM        |
| CGP 57380                            | 100 nM        |
| XMD8-92                              | 100 nM        |
| OTS964                               | 100 nM        |

|                                  |        |
|----------------------------------|--------|
| CCT196969                        | 100 nM |
| BI-847325                        | 100 nM |
| CEP-32496                        | 100 nM |
| TWS119                           | 100 nM |
| MK-8353 (SCH900353)              | 100 nM |
| Apixaban                         | 100 nM |
| Orlistat                         | 100 nM |
| Aminophylline                    | 100 nM |
| Gemfibrozil                      | 100 nM |
| Fenofibrate                      | 100 nM |
| Carbidopa                        | 100 nM |
| Dipyridamole                     | 100 nM |
| Isoniazid                        | 100 nM |
| Rosiglitazone HCl                | 100 nM |
| Bexarotene                       | 100 nM |
| Synephrine                       | 100 nM |
| Phloretin                        | 100 nM |
| Benserazide HCl                  | 100 nM |
| CP-91149                         | 100 nM |
| NPS-2143                         | 100 nM |
| AM251                            | 100 nM |
| Dalcetrapib (JTT-705, RO4607381) | 100 nM |
| CPI-613                          | 100 nM |
| WZ811                            | 100 nM |
| Trolox                           | 100 nM |
| Meptazinol HCl                   | 100 nM |
| Guggulsterone E&Z                | 100 nM |
| Schisandrin A                    | 100 nM |
| Panobinostat (LBH589)            | 100 nM |
| SU11274                          | 100 nM |
| SRT1720 HCl                      | 100 nM |
| CUDC-101                         | 100 nM |
| BMS-754807                       | 100 nM |
| MK-8245                          | 100 nM |
| PFI-1(PF-6405761)                | 100 nM |
| Ki16425                          | 100 nM |
| Isotretinoin                     | 100 nM |
| Org 27569                        | 100 nM |
| Dapagliflozin                    | 100 nM |
| Naproxen Sodium                  | 100 nM |
| Clemastine Fumarate              | 100 nM |
| Stattic                          | 100 nM |
| opaganib                         | 100 nM |
| Baf312                           | 100 nM |

|                   |            |
|-------------------|------------|
| JTE013            | 100 nM     |
| reversine         | 100 nM     |
| PIK-III           | 100 nM     |
| cerdulatinib      | 100 nM     |
| Spautin-1         | 100 nM     |
| vorapaxar         | 100 nM     |
| AS1517499         | 100 nM     |
| autophinib        | 100 nM     |
| Phy34             | 100 nM     |
| sulfacetamide     | 100 nM     |
| IITZ-01           | 100 nM     |
| Ead1              | 100 nM     |
| 5-Iodotubercidin  | 100 nM     |
| schizandrolB      | 100 nM     |
| Wm-1119           | 100 nM     |
| Lys05             | 100 nM     |
| Smi-16a           | 100 nM     |
| Smer28            | 100 nM     |
| peiminine         | 100 nM     |
| PF-04965842       | 100 nM     |
| OroxylinA         | 100 nM     |
| PFK158            | 100 nM     |
| Oclacitinib       | 100 nM     |
| artemisinin       | 50 $\mu$ M |
| metformin         | 10 mM      |
| Celecoxib         | 50 $\mu$ M |
| doxazosin         | 50 $\mu$ M |
| resveratrol       | 50 $\mu$ M |
| glimepiride       | 50 $\mu$ M |
| cimitidine        | 50 $\mu$ M |
| dipyridamole      | 50 $\mu$ M |
| isoniazid         | 50 $\mu$ M |
| probucol          | 50 $\mu$ M |
| rosiglitazone     | 50 $\mu$ M |
| acemetacin        | 50 $\mu$ M |
| Vc                | 50 $\mu$ M |
| disulfiram        | 20 $\mu$ M |
| mesalazine        | 20 $\mu$ M |
| berberine         | 50 $\mu$ M |
| aspirin           | 10 mM      |
| curcurine         | 20 $\mu$ M |
| Terazosin         | 100 nM     |
| Compoud401        | 100 nM     |
| Indole-3-carbinol | 100 nM     |



|                |        |
|----------------|--------|
| Magnolol       | 100 nM |
| evodiamine     | 100 nM |
| MI130          | 100 nM |
| Imd0354        | 100 nM |
| pdca           | 100 nM |
| curcumenol     | 100 nM |
| diethylmaleate | 100 nM |
| Qnz            | 100 nM |
| Gsk583         | 100 nM |
| engeletin      | 100 nM |

---
